# A unicellular walker controlled by a microtubule-based finite state machine

Ben T. Larson<sup>1</sup>, Jack Garbus<sup>2</sup>, Jordan B. Pollack<sup>2</sup>, and Wallace F. Marshall<sup>1\*</sup>

## Summary

Cells are complex biochemical systems whose behavior emerges from interactions among myriad molecular components. Computation is often invoked as a general framework for navigating this cellular complexity. However, it is unclear how cells might embody computational processes such that theories of computation, including finite state machine models, could be productively applied. Here, we demonstrate finite state machine-like processing embodied in cells using the walking behavior of *Euplotes eurystomus*, a ciliate that walks across surfaces using fourteen motile appendages (cirri). We found that cellular walking entails regulated transitions between a discrete set of gait states. The set of observed transitions decomposes into a small group of high-probability, temporally irreversible transitions and a large group of low-probability time-symmetric transitions, thus revealing stereotypy in sequential patterns of state transitions. Simulations and experiments suggest that the sequential logic of the gait is functionally important. Taken together, these findings implicate a finite state machine-like process. Cirri are connected by microtubule bundles (fibers), and we found that the dynamics of cirri involved in different state transitions are associated with the structure of the fiber system. Perturbative experiments revealed that the fibers mediate gait coordination, suggesting a mechanical basis of gait control.

---

<sup>1</sup> Department of Biochemistry and Biophysics, University of California, San Francisco, California, USA

<sup>2</sup> Computer Science Department, Brandeis University, Waltham, Massachusetts, USA

\* Correspondence: [wallace.ucsf@gmail.com](mailto:wallace.ucsf@gmail.com)

## 23 **Keywords**

24 cellular behavior, information processing, computation, decision-making, broken detailed  
25 balance, gait coordination, cell motility, cilia, ciliate, tubulin

## 26 **Introduction**

28 Cells are complex physical systems controlled by networks of signaling molecules.  
29 Single cells can display remarkably sophisticated, animal-like behaviors <sup>1-3</sup>, orchestrating active  
30 processes far from thermodynamic equilibrium in order to properly carry out biological functions  
31 <sup>4,5</sup>. Indeed, single cells can make decisions by sensing and responding to diverse cues and signals  
32 <sup>6</sup>, execute coordinated movements <sup>7,8</sup> and directed motility <sup>9-12</sup>, and even solve mazes <sup>13,14</sup> and  
33 possibly learn <sup>15-18</sup>. Such behaviors in animals arise from neural activity and have been studied  
34 extensively, but we know comparatively little about the mechanisms of cellular behavior <sup>19,20</sup>. In  
35 individual cells, behaviors emerge directly through the joint action of chemical reactions <sup>21</sup>,  
36 cellular architecture <sup>3</sup>, physical mechanisms and constraints within the cell <sup>22,23</sup>, and interactions  
37 of the cell with its local environment <sup>24</sup>. The links between information processing, decision  
38 making, and the physical manifestation of those processes as cell state transitions suggest that  
39 cellular behavior might be understood as an embodied computation <sup>25,26</sup>. The theory of  
40 computation has often been invoked as a general framework for understanding cellular dynamics  
41 <sup>25,27-32</sup>, environmental sensing by bacteria being a deeply studied example <sup>31-33</sup>, and has been  
42 used to engineer programmable cell states <sup>34</sup>. However, the manner and extent to which cells  
43 might embody functional, computational processes as well as the extent to which a  
44 computational perspective on cellular behavior might prove productive remains to be seen.

45 Among the microbial eukaryotes (protists), ciliates display some of the most striking  
46 examples of unicellular behavior, including hunting <sup>3</sup>, sensorimotor navigation <sup>10</sup>, and predator

47 avoidance<sup>35</sup>. Spirotrichous ciliates of the genus *Euplotes* are notable for their complex  
48 locomotion<sup>36–38</sup>, using bundles of specialized cilia (cirri) to walk across surfaces<sup>36,37</sup> (Figure 1A,  
49 Videos S1 and S2). Depending on the species, these cells generally have 14 to 15 ventral cirri  
50 arranged in a highly consistent pattern used for walking locomotion<sup>39</sup>. *Euplotes* live in aquatic  
51 environments, and in addition to walking, use their cirri for swimming and rapid escape  
52 responses<sup>40</sup> (Video S2). Oral membranelles (Figure 1B) generate feeding currents to capture  
53 bacteria and small protistan prey and are also used for swimming. Early 20<sup>th</sup> century  
54 protistologists were so impressed by the apparent coordination of cirri that they proposed the  
55 existence of a rudimentary nervous system, the neuromotor apparatus, to account for their  
56 observations<sup>38</sup>. This theory was motivated by the presence of intracellular fibers connecting  
57 various cirri (Figure 1C), now known to be to be tubulin-based structures<sup>41,42</sup>.

58         How can a single cell coordinate a gait without a nervous system? Although the walking  
59 movements of *Euplotes* are superficially similar to those of animals such as insects, the low  
60 Reynolds environment of aquatic microorganisms, where viscous forces dominate over inertial  
61 forces, imposes significant physical constraints on all movements that do not impinge on the  
62 movements of larger terrestrial animals<sup>43</sup>. Coordination, to the extent that it exists in the gait of  
63 *Euplotes*, would require some kind of dynamical coupling among cirri or between cirri and some  
64 shared external influence. Recently, analytical techniques from statistical physics have been used  
65 to characterize, understand, and predict mesoscale dynamics in biological systems, including  
66 cellular behavior<sup>4,5,44,45</sup>. These approaches rely on coarse-graining the complexity of biological  
67 dynamics into states and analyzing the transitions among states. In particular, a state  
68 representation allows us to ask whether forward and reverse transitions among states are equal, a  
69 condition known as detailed balance<sup>4,46</sup>. Systems that violate detailed balance operate in a non-  
70 equilibrium mode, display net probability flows, and can produce directed cycles in state space

71 <sup>4,47</sup>. Broken detailed balance has been observed in the motility dynamics of cultured mammalian  
72 cells as well as the motility dynamics of a freely behaving flagellate protist <sup>5,44</sup> and implies that  
73 non-equilibrium models are most applicable to such systems <sup>45</sup>. Identification of broken detailed  
74 balance, therefore, highlights temporal irreversibility and can indicate active control of biological  
75 dynamics.

76         When information processing drives patterns of state transitions, such a system can be  
77 analyzed using automata theory, a fundamental level in the theory of computation <sup>48–50</sup>.  
78 Automata theory can be used to address problems of decision-making and control in complex  
79 systems by providing predictive understanding that is independent of the underlying details of  
80 how a given process is implemented <sup>49</sup>. Inspired by work considering cellular behavior in the  
81 context of the theory of computation <sup>25</sup>, we hypothesized that walking cells might be governed  
82 by finite state automata with directed, processive movement arising from reproducible patterns  
83 of state transitions. Although the behavioral repertoire of *Euplotes* in different environmental  
84 conditions represents a rich and complex phenomenology involving information processing <sup>51</sup>,  
85 for experimental tractability, we chose to focus on the reproducible, spontaneous linear walking  
86 behavior of cells. We reasoned that cellular walking might require some form of information  
87 processing to properly coordinate the movements of cirri.

88         The consistent structure of *Euplotes*, its mode of motility, and its ease of observation  
89 make these cells an ideal biological test-bed in which to apply theories of non-equilibrium  
90 statistical mechanics and embodied computation, both of which rely on describing a system in  
91 terms of discrete state transitions. Here, we use time-lapse microscopy and quantitative analyses  
92 to show that *Euplotes eurytomus* walks with a cyclic stochastic gait displaying broken detailed  
93 balance and exhibiting elements of stereotypy and variability, in accord with a finite state  
94 automaton representation. The observed dynamics are reminiscent of behavioral regulation in

95 some cells and animals <sup>5,52</sup> but contrast with many well-characterized examples of cellular and  
96 organismal motility <sup>7,9,59,10,12,53–58</sup>. Our results provide a demonstration of state machine-like  
97 processes governing cellular state transitions as well as an illustration of how such a  
98 computational perspective can drive mechanistic insight and serve as a framework for  
99 investigating the principles of behavioral control and non-equilibrium dynamics in single cells.

100

## 101 **Results**

### 102 **A reduced state space is sufficient to describe walking dynamics**

103 In order to ask whether cell behavior is governed by a finite state machine, we analyzed  
104 the walking behavior of *Euplotes eurystomus* cells, <sup>40</sup>, focusing on the simplest case of  
105 uninterrupted, linear walking trajectories (Figure 2A,B, Video S1). Cells were placed onto  
106 coverslips on which free, spontaneous walking behavior was observed by microscopy (imaged at  
107 33 frames/s). A focal plane at the cirrus-coverslip interface was chosen in order to clearly  
108 observe cirral dynamics (Figure 2A). The consistency of the relative spatial positioning of cirri  
109 across cells allowed us to give each of the 14 cirri an alphabetic label from a-n (Figure 2C).  
110 During walking, cirri move in a manner analogous to the recovery stroke-power stroke cycle  
111 executed by many eukaryotic flagella, first lifting off the substrate and sweeping close to the cell  
112 body before extending in roughly the direction of cell orientation before sweeping downward to  
113 reestablish contact with the substrate <sup>37,60,61</sup> (Figure 2B, Video S1). In each video frame, the  
114 walking state of the cell was encoded as a 14-element binary vector, with each element  
115 corresponding to a cirrus and receiving a value of “0” if the cirrus was in contact with the  
116 coverslip and stationary and a “1” if the cirrus was in motion or had moved in the preceding  
117 interval between frames (instances of stationary cirri held above the coverslip for a sustained  
118 period of time were not observed). The trajectories of 13 cells were manually tracked and

119 annotated for a total of 2343 time points. This quantitative analysis revealed stepping-like cirral  
120 dynamics: cirri tend to undergo rapid movements followed by longer periods of quiescence  
121 (Figure 2D). Cirral dynamics seemed to lack any obvious patterns such as periodicity or  
122 repeating sequences of states (e.g. Figure 2D), implying that the state sequences are generated  
123 either by stochastic processes or complex deterministic mechanisms. This lack of periodicity  
124 (confirmed by autocorrelation analysis, Figure S1) or fixed phase relationships between  
125 appendage movements is different from those reported for various unicellular flagellates and the  
126 gaits of most animals<sup>58,62,63</sup>.

127         Despite the apparent complexity of cirral dynamics, we wondered whether there might be  
128 some underlying structure, which would allow us to effectively coarse-grain the dynamics in a  
129 principled manner. We first sought to obtain a reduced state space that could accurately describe  
130 the dynamics, as has proven successful in behavioral analysis of diverse living systems<sup>44,45,64-67</sup>.  
131 Because our ultimate goal was to identify interpretable motifs among the patterns of cirral  
132 activity, which entail strictly nonnegative values, we chose to perform dimensionality reduction  
133 by non-negative matrix factorization (NMF), a technique that has been used to identify patterns  
134 for textual analysis, natural language processing, neural activity analysis, and gene expression  
135 analysis<sup>68,69</sup>. NMF revealed the cirral states to be well-described by a three-dimensional NMF  
136 space (Figure 2E-G, see Method Details and Figure S1 for more details). Factors of the NMF  
137 (H1, H2, H3) constitute the basis of the NMF space and correspond to non-overlapping groups of  
138 cirri. These factors indicate features of cirral activity that in various weighted combinations can  
139 be used to compactly represent all of the cirral activity measurements. These groups of cirri  
140 constitute spatially distinct partitions of cirri with respect to their positions on the cell body  
141 (Figure 2H). The dimensionality reduction of the gait state space arises in part from shared  
142 pairwise mutual information between groups of cirri (Figure 2I). Here, mutual information

143 quantifies the amount of information about the patterns of activity of one cirrus gained by  
144 measuring the activity of another, and in this way acts like a generalized measurement of  
145 correlation. Therefore, dimensionality reduction by NMF reflects correlations in cirral activity.

146 Noting the apparent structure of the data visualized in the reduced gait state space in the  
147 form of clusters of points in NMF space (Figure 2E-G), we next sought to identify individual gait  
148 states defined in terms of similar patterns of cirral activity indicated by these clusters. To do this,  
149 we applied the density-based spatial clustering of applications with noise (DBSCAN) algorithm  
150 <sup>70</sup> to group the output of NMF into clusters in an unbiased fashion, with members of a given  
151 cluster sharing similar patterns of cirral activity (see Method Details and Figure S1 for more  
152 details). Although NMF can itself be used to define clusters, the advantage of clustering in two  
153 steps, NMF followed by DBSCAN, is that we could use the visual observation of clustering in  
154 the NMF output to confirm correct performance of the subsequent clustering step. The effect of  
155 this two-step approach to coarse graining, which is a commonly used in clustering of single-cell  
156 transcription data, is to reduce noise while retaining features that can accurately capture the  
157 complexity of cirral activity. Visual inspection in conjunction with silhouette coefficient (a  
158 metric of cluster cohesion and separation) analysis <sup>71</sup> revealed that 32 clusters accurately  
159 captured the visible structure in the reduced state space without overfitting (Figure 2E-G,  
160 Method Details and Figure S1). These reduced gait states correspond to distinct patterns of cirral  
161 activity (Figure 2J).

162 Taken together, our results reveal stereotypy in the spatiotemporal patterns of cirral  
163 activity, consistent with the behavior of a finite state machine. The discrete set of gait states,  
164 which exist in the reduced gait state space, demonstrate that cells make use of a subset of the  
165 possible patterns of appendage movement during walking locomotion.

166 ***Euplotes walks with a cyclic stochastic gait***

167 In order to relate the gait states identified in our cluster analysis to cell motility, we asked  
168 how changes in the number of active cirri may relate to cell movement. At low Reynolds  
169 number, velocity of a suspended particle is proportional to the difference between the net force  
170 acting on it and the opposing drag <sup>43</sup>, so cell velocity provides a relative readout of net  
171 locomotive force. Naively, one might expect that the force associated with locomotion is roughly  
172 proportional to the number of moving appendages <sup>72</sup>. Alternatively, the velocity might inversely  
173 correlate with the net change in cirral activity, which would be expected if stationary cirri were  
174 generating a pushing traction force as in crawling or climbing animals <sup>62,73</sup> or if cirri execute a  
175 power stroke just before coming to rest as has been suggested previously <sup>37</sup>. However, we found  
176 that data supported neither expectation: cell velocity was only weakly correlated with number of  
177 active cirri ( $R^2=0.03$ ), and instead, the largest cell velocities corresponded to small-to-moderate  
178 changes in the number of active cirri (Figure 3A). We hypothesized that transitions between gait  
179 states must be important to driving the forward progression of walking cells, and thus sought to  
180 determine whether such active coordination might manifest in the observed gait dynamics.

181 To search for evidence of active coordination dictating gait state transitions, we  
182 calculated the forward and reverse transition rates between states from the 1423 pairwise  
183 transitions in our dataset as  $N_{ij}/T$  where  $N_{ij}$  is the total number of transitions observed between  
184 states  $i$  and  $j$ , and  $T$  is the total observation time (Figure 3B, see Method Details). We note that  
185 the transition rate we define here is proportional to the probability current  $J_{ij} = P_i k_{ij}$  where  $P_i$  is  
186 the probability of state  $i$  and  $k_{ij}$  is the conditional transition probability analogous to a chemical  
187 reaction rate. Although walking, and cilia-based motility in general, is fundamentally non-  
188 equilibrium in the sense that it requires energy input, a coarse-grained representation of motility  
189 such as the one we pursue here need not exhibit broken detailed balance <sup>5</sup>. However, broken  
190 detailed balance in gait state transitions (unbalanced forward and reverse transitions) would



191 indicate a non-equilibrium process dictating temporal directedness (irreversibility) to gait state  
192 transitions, thus implicating active coordination in terms of stereotyped sequential changes in  
193 cirral activity. Importantly, broken detailed balance in gait state transitions define an identifiable  
194 temporal direction in sequences of gait state transitions. The presence of strongly unbalanced  
195 transitions such as from gait state 3 to 17 versus 17 to 3 suggested broken detailed balance, and  
196 indeed, a number of forward and reverse transitions were found to be significantly unbalanced by  
197 the binomial test (see Method Details). Unbalanced transitions can also arise in equilibrium  
198 systems that have not yet reached steady state, in which case transition rates may change in time.  
199 To test whether the gait operates at steady state, we checked whether the total number of  
200 transitions into each state were balanced by total transitions out of that state:  $\sum_j N_{ij} = \sum_j N_{ji}$ .  
201 Consistent with steady state dynamics, we found that this condition held to within a difference of  
202 at most a single transition. Although there are cases where non-equilibrium state transitions can  
203 nevertheless exhibit balanced transitions, the presence of unbalanced transitions existing as part  
204 of loops in state space unambiguously indicated non-equilibrium dynamics. To illustrate this  
205 non-equilibrium or temporally irreversible character of gait state transitions, we apply the  
206 Kolmogorov criterion, which specifies the necessary and sufficient condition for reversibility  
207 that the product of transition probabilities traversing any closed loop in state space must equal  
208 the product of the transition probabilities in the reverse direction<sup>5,74</sup>. Due to the presence of  
209 unbalanced transitions, the gait of *Euplotes* clearly violates this condition; for example,  
210  $k_{1,2}k_{2,3}k_{3,17}k_{17,1} = 0.003 \neq k_{1,17}k_{17,3}k_{3,2}k_{2,1} = 0.0005$ , where each  $k_{i,j}$  is the conditional probability of  
211 transitioning from state  $i$  to state  $j$  estimated as  $N_{ij}/N_i$  with  $N_i$  the total number of transitions from  
212 state  $i$ . To further understand the degree to which detailed balance was broken, or, similarly, the  
213 distance from equilibrium, we calculated the entropy production rate<sup>5</sup>. Following the procedure  
214 detailed by Wan and Goldstein<sup>5</sup>, we obtained a lower bound estimate for an entropy production

215 rate of 0.4 nats, similar to the value reported for strongly non-equilibrium gait transitions  
216 observed in a flagellate<sup>5</sup>. Walking *Euplotes* cells, therefore, have a non-equilibrium gait,  
217 displaying temporal order in sequences of appendage movement, despite a lack of standard gait  
218 periodicity.

219 We next sought to better understand the organization and sequential logic of this unusual  
220 gait. First, we noted that gait state transitions appear constrained: only 322 of the 1024 possible  
221 types of transitions were observed to occur at least once, and within this restricted set, only 173  
222 occurred more than once (Figure 3C). Crucially, the presence of broken detailed balance  
223 revealed directed cycles of cirral activity during locomotion pushing the system away from  
224 equilibrium, yielding a temporal directedness or irreversibility to sequences of gait state  
225 transitions in spite of the lack of standard gait periodicity. To investigate the nature of these  
226 cycles, we grouped transitions into two categories: balanced transitions, which satisfy detailed  
227 balance, and unbalanced transitions, which do not (see Method Details). This partitioning  
228 allowed us to separately investigate unbalanced, non-equilibrium-like and balanced, equilibrium-  
229 like transitions (Method Details, Figure 3D,E). We found that unbalanced transitions occur at  
230 relatively high frequency but involve a small number of states (Figure 3D). Of the 32 gait states,  
231 only states 2, 3, 4, 7, 17, and 27 (Figure 3F) are associated with unbalanced transitions, and  
232 among these states, three formed a directed cycle following  $2 \rightarrow 3 \rightarrow 17 \rightarrow 2$ . We had expected that  
233 unbalanced transitions might be associated with a “power stroke” (in the sense of occurring  
234 simultaneously with cell movement) but found instead that high cellular velocities tend to be  
235 associated with balanced transitions (Figure 3D,E) and that relatively few transitions  
236 corresponded to substantial cell movement (Figure 3C). Additionally, we found that, with the  
237 exception of transitions between states 1 and 2, the highest frequency transitions are unbalanced  
238 (Figure 3D).

239           Notably, the most frequent balanced transitions were associated with transitions into and  
240 out of gait state 1, a unique “rest state” which involves no cirral movement (Figure 2J).  
241 Furthermore, we found by autocorrelation analysis of gait trajectories that gait state 1 uniquely  
242 exhibited significant positive autocorrelation (see Method Details, Figure S1). Investigation of  
243 transitions to and from gait state 1 revealed that although transitions between gait states 1 and 2  
244 are balanced, the most frequent transitions out of gait state 2 are strongly biased toward  
245 transitions into gait state 3, from which other strongly biased transitions also frequently occur,  
246 including the cycle of biased transitions mentioned above. Despite the presence of high  
247 frequency unbalanced transitions, the gait of *Euplotes* involves highly variable trajectories  
248 through gait state space. The picture of walking trajectories that emerges is one of stochastic  
249 excursions from gait state 1 into non-determinate paths through state space involving a mix of  
250 balanced and unbalanced transitions. The majority of cell movement occurs during infrequent,  
251 equilibrium-like (balanced) transitions. These balanced transitions are temporally reversible, but  
252 we wondered whether there might be some asymmetry in the amount of cell movement due to  
253 transitions leading toward versus away from the cycle states. We found that although balanced  
254 transitions leading away from the cycle states account for 7.6% more cell movement, the  
255 difference in these transitions is not statistically significant ( $p=0.09$  by two-sample Kolmogorov-  
256 Smirnov test). Temporal irreversibility, or directedness, in sequential changes in cirral activity  
257 arises from biased, non-equilibrium-like (unbalanced) transitions, occurring at relatively high  
258 frequency from a small subset of states. A natural question arising from the observation of these  
259 complex patterns is whether gait state transitions conform to a first-order Markov process, often  
260 referred to as “memoryless”<sup>75</sup>, which entails that transition probabilities are determined  
261 completely by the present state, and that previous dynamics contribute no additional predictive  
262 information<sup>76,77</sup>. Does the cell retain some “memory” of past cirral activity that might influence

263 future cirral activity? While not conclusive, several analyses (see Method Details and Figure S1)  
264 suggested that *Euplotes* retains some “memory” of the prior sequence of cirral movements  
265 during locomotion in that the gait may not conform to a continuous- or discrete-time first-order  
266 Markov process.

267         Taken together, our analysis revealed a mixture of unbalanced transitions driving cycles  
268 and balanced transitions arranged as networks, for which we propose to apply the term “cyclic  
269 stochastic gait”. The cyclic stochastic gait of *Euplotes eury stomus* incorporates elements of both  
270 stereotypy and variability in gait dynamics, in terms of biased transitions and non-determinate  
271 sequences of gait state transitions respectively. Forward progress of the cell is not produced  
272 merely by a physical ratchetting process driven by unpatterned fluctuations in cirral activity, nor  
273 is it produced by a highly regular, deterministic process like a clock. It has been argued that  
274 significant computation arises in physical systems exhibiting such a mix of stereotypy and  
275 variability<sup>48,78–80</sup> in the sense that the time-evolution of the system is most compactly described  
276 as the result of a computational process involving state transitions, memory, and decision rules,  
277 rather than periodic oscillations or random coin flips.

278         Our analysis suggested a computational underpinning of gait, so we sought to better  
279 understand the functional organization of the dynamical patterns, the sequential logic of the gait.  
280 Focusing on the dominant structure of gait transitions in terms of transition probabilities (Figure  
281 3G, Method Details) allowed us to derive a simplified, functional representation of stereotypy in  
282 gait dynamics as depicted in Figure 3H. We found that few states were the recipients of the  
283 majority of the highest probability transitions and that many received no high probability  
284 transitions (Figure 3G). Additionally, we found a “cloud” of states linked by low-probability  
285 balanced, equilibrium-like fluctuations. Nearly all of the states receiving high probability  
286 transitions were either the three “cycle states” or else fed cycle states with their highest

287 probability transitions, with the majority feeding gait state 17. Although gait state 1 is not the  
288 recipient of any individual high probability transitions, we identified it as the unique “start” state  
289 from which cells initiate walking. Beginning with this start state, cells transition with high  
290 probability to gait state 2, also one of the highest frequency transitions and the first state in the  
291  $2 \rightarrow 3 \rightarrow 17 \rightarrow 2$  cycle of unbalanced transitions. From this first cycle state, cells transition to gait  
292 state 3, the second cycle state, with highest probability and frequency and then similarly on to  
293 gait state 17, the third cycle state. This sequence from the start state through the cycle states  
294 corresponds to increasing amounts of cirral activity. Although the highest probability transitions  
295 from the third cycle state to any single gait state tend to return to the first or second cycle state  
296 with equal probability, cells in fact transition to the equilibrium “cloud” of motility-associated  
297 states with overall higher probability. Return to the cycle states tend to occur through various  
298 moderately high probability transitions from the motility state cloud or through a restricted set of  
299 intermediate states. In conjunction with this set of transitions, we also noted unbalanced  
300 transitions stemming from the cycle states to the motility state as well as the presence of  
301 intermediate states from a given cycle state that subsequently feed the next cycle state.

302 Altogether, the picture of stereotypical gait dynamics that emerges is of biased transitions  
303 involving cycle states preceding relatively low probability, unbiased transitions associated with  
304 substantial cell movement before returning to the start or cycle states and beginning the sequence  
305 again. While this general sequence is repeated during walking, there is considerable variability or  
306 apparent stochasticity in the details of gait state transitions departing from the start state with  
307 increasingly variable transitions as any given sequence progresses. Given that the motion of the  
308 cell alternates between periods of highly processive forward motion and other periods in which  
309 the cirri seem to flail ineffectually without driving the cell forward, one might assume that the  
310 periods of effective motion would correspond to the highly directed cycle of unbalanced

311 transitions and the periods of flailing would correspond to the cloud of balanced, random  
312 transitions, but in fact the opposite is the case. We hypothesized that sequences involving the  
313 cycle states serve to establish configurations of cirri necessary for cells to later transition  
314 between states from which substantial forward progress of the cell is generated. Many state  
315 transitions along any instance of the stereotyped sequence are unbiased; however, biased, high  
316 probability transitions, presumably resulting from active cellular control, give temporal  
317 irreversibility to the sequence. We note here that although our coarse-graining procedure to  
318 identify gait states does not constitute a unique representation of gait structure, we can be  
319 confident that our analysis captures structure in gait dynamics, the presence of broken detailed  
320 balance in particular. In general, coarse-graining of the state space of a system can obscure  
321 broken detailed balance, but the net flux of transitions in the state space of a system should not  
322 arise in an illusory fashion based on a coarse-graining procedure or partial observation of a  
323 system<sup>81-83</sup>. Additionally, we have chosen a coarse-graining procedure based on the properties  
324 of our particular data and demonstrate its performance on simulated cirral dynamics with varying  
325 noise and for the case of unpatterned, random cirral fluctuations (Figure S1, Method Details).

326 Finally, we sought to investigate the functional significance of the sequential logic of the  
327 gait in driving processive cell movement. To do so, we developed a simple model based on a  
328 coarse-grained physical picture of cellular walking (Figure 3I). Briefly, we consider a 2D system  
329 where a cell walks using its 14 cirri, which can exist in two states: moving or not moving. As we  
330 are agnostic to the details by which cirri generate forces involved in motility, we model cirri as  
331 producing constant force in the direction of cell orientation while moving and resisting  
332 displacement by acting as linear springs when not moving. Cell position and orientation is  
333 defined in terms of the equilibrium positions of the cirri. For simulations, we use relative  
334 positions of cirri taken from stationary cell measurements (Figure 3J). In each timestep of the

335 simulation, we calculate a cell displacement based on the sum of forces due to the cirri and  
336 changes in cell orientation from the sum of torques (see Method Details). We found that this  
337 simple model was sufficient to qualitatively and semi-quantitatively reproduce the linear  
338 trajectories of walking cells when we ran simulations using the actual patterns of cirral activity  
339 from walking cells (Figure 3K, Figure S2). When we ran simulations with either the same gait  
340 states as those from actual cells but in a shuffled order or random cirral activity with the same  
341 average cirral activity as actual cells, we found that path straightness significantly decreased in  
342 the case of shuffled transitions ( $p=0.04$  by Wilcoxon rank sum test) and scaled cell velocity  
343 significantly decreased in the case of random activity ( $p=0.003$  by Wilcoxon rank sum, Figure  
344 3K-O). Note that in both the case of shuffled transitions and random cirral activity, gait state  
345 transitions satisfy detailed balance (Figure S2). These results suggest that the sequential logic of  
346 the gait is functionally significant in a manner consistent with our biophysical picture of walking.

### 347 **The microtubule-based fiber system mediates gait coordination**

348 The complex yet sequentially structured gait patterns in conjunction with our simulation  
349 results are consistent with the existence of some form of nontrivial gait coordination. What  
350 physical machinery could embody the information processing required to generate the stochastic  
351 cyclic state transitions seen during *Euplotes*' walking? We reasoned that there must be some  
352 form of coupling or communication between cirri or feedback between gait states and cirral  
353 dynamics. Since the early 1900s, the role of the system of cytoskeletal fibers associated with  
354 cirri as conduits of information between cirri during cellular locomotion, supported by  
355 microsurgical experiments, has been a dominant yet contentious hypothesized mechanism of gait  
356 coordination<sup>84–86</sup>. We wondered whether the structure of the cytoskeletal fiber system associated  
357 with cirri (Figure 4A) could give some insight into how cirri might be coordinated.

358 We reconstructed in 3D the microtubule-based fiber system of *Euplotes* associated with  
359 cirri and lying just beneath the cell cortex<sup>38,41,42</sup>. Upon inspection of our confocal  
360 reconstructions of SiR-tubulin labeled cells (Figure 4A, Figure S3), we noted the presence of two  
361 morphologically distinct classes of fibers, one thicker and linear and the other thinner, splayed,  
362 and less linear, consistent with previous observations (Figure 1C,<sup>38,41,42</sup>). Fibers emanate from  
363 the base of all cirri, appear to intersect one another, and also connect to the cortex of the cell at  
364 various points. Some cirri were found to be associated with only thick fibers, while others have  
365 both or only thin fibers. Based on apparent fiber intersections and convergences, we found the  
366 fiber system forms a continuous network between all cirri, with the fibers associated with the  
367 base of each cirrus intersecting the fiber system of at least one other cirrus (Figure 4A,B).

368 Contrary to the long-standing standing hypothesis from the literature<sup>84</sup>, the functional  
369 modules (groups of co-varying cirri) identified in our dynamical analysis were not exclusively  
370 linked by dense fiber intersections (Figure 4A,B)<sup>38,42,84</sup>. In fact, connections between cirri are  
371 not generally associated with any statistically significant difference in mutual information  
372 (defined in terms of the information that the activation state of one cirrus has concerning the  
373 other) compared to unlinked pairs of cirri ( $p=0.14$  by Wilcoxon rank sum test, Figure 4C).  
374 However, information flow became apparent when fiber-fiber links were grouped by type (i.e.  
375 thick to thick fiber, thick to thin fiber, or thin to thin fiber). Under this grouping, we found that  
376 pairs of cirri associated with only thick to thick fiber and only thin to thin fiber links have  
377 increased mutual information compared to those without links (Figure S3). Interestingly, we  
378 found that cirri nearby one another and connected by fibers to similar regions of the cell cortex  
379 shared the most mutual information (Figure 2C,G, 4D,E), suggesting that if the fibers play a role  
380 in cirral coordination, coupling may also be mediated by mechanisms involving the cirrus and  
381 fiber-cortex interface. Cirri d, e, h, i, for example, share very little mutual information with any



382 of the other cirri, and fibers emanating from the base of these cirri contact the cell cortex and  
383 other fibers at various unique points. On the other hand, cirri g and f, which share more mutual  
384 information than any other pair, are associated with both thick and thin fibers terminating at  
385 similar regions of the cell cortex. Indeed, distances between pairs of cirri and cross nearest-  
386 neighbor distance<sup>87</sup> between paired sets of cirrus-cortex contact points both show significant  
387 Spearman correlations (-0.49,  $p < 0.001$  and -0.62,  $p < 0.001$  respectively) to mutual information  
388 (Figure 4D,E). These correlations indicate that mutual information between pairs of cirri tends to  
389 increase with proximity and also tends to increase with similarity between fiber-cortex contact  
390 locations. Thus, the cirri with the highest mutual information are those that are close together  
391 with similar fiber-cortex connections (Figure 4D-F).

392 Together, these observations suggest a mechanism of mechanical coordination in which  
393 microtubule bundles allow groups of cirri to influence successive behavior of other groups of  
394 cirri. We first sought to test this hypothesized mechanism by perturbing the fiber system using  
395 drug treatments. We observed that nocodazole, a drug that blocks the polymerization of  
396 microtubules, affected walking motility, causing cells to walk along more compact trajectories  
397 due to increased turning (Figure 5A,B, Videos S3 and S4) in a manner reminiscent of historical  
398 reports of altered walking due to microsurgery in ciliate *Stylonychia*<sup>88</sup>. In contrast to the effect  
399 of nocodazole, we found that the microtubule stabilizer paclitaxel caused cells to walk along less  
400 convoluted trajectories compared to controls (Figure 5C). Quantifying these effect from video  
401 microscopy of cells under darkfield illumination in terms of a scaled path length defined as the  
402 total integrated path length walked by cells scaled by the maximum radial distance traversed,  
403 where a decrease in linear runs decreases this scaled path length, we found that nocodazole  
404 significantly decreased and that paclitaxel significantly increased the scaled path length of cells  
405 compared to controls (Figure 5D). We further noted that nocodazole acted in a dose dependent

406 and reversible manner (Figure 5D and Figure S4). To test whether the actin cytoskeleton might  
407 also regulate motility, we treated cells with actin inhibitors including latrunculin, cytochalasin,  
408 and jasplakinolide and observed no effect on motility (Figure S4). The specific and opposing  
409 effects of a microtubule polymerization inhibiting drug (nocodazole) versus a microtubule  
410 stabilizing drug (paclitaxel) were consistent with the microtubule cytoskeleton playing a key role  
411 in coordinating walking motility. Next, we checked whether nocodazole treatment had an  
412 observable effect on the fiber system. By analyzing 3D reconstructions of confocal images of  
413 SiR-tubulin labeled cells, we found that fiber length significantly decreased compared to controls  
414 in cells where microtubule polymerization was disrupted by nocodazole (Figure 5E-G). Further,  
415 we were unable to detect the presence of any thin fibers in four out of seven nocodazole treated  
416 cells used for fiber analysis. Of the three cells with detectable thin fibers, we never observed  
417 connections between fibers associated with cirri a, b, and c and any other fibers. Additionally, we  
418 did not observe any thin fibers making distal cortical contacts. We did note, however, that when  
419 thin fibers were visible, connections appeared to be the same as those in Figure 4A,B. We then  
420 investigated how cirral dynamics were affected. Following the gait annotation procedure detailed  
421 previously, we characterized the walking dynamics of 6 nocodazole treated cells for a total of  
422 1133 timepoints. Of those timepoints, 681 corresponded to cirral configurations never observed  
423 in untreated cells with a total of 391 new unique configurations. Projecting these new  
424 configurations onto the NMF space we obtained previously, however, revealed that most of the  
425 cirral configurations in nocodazole treated cells were near or within the clusters corresponding to  
426 the gait states we obtained from untreated cells (Figure S4). This allowed us to map new cirral  
427 configurations onto the gait states (see Method Details). We did note that while close to the  
428 original gait states, new cirral configurations tended to skew towards more active cirri, and we  
429 also noted the presence of a new cluster involving movement in all or nearly all cirri, to which

430 we assigned a new gait state (Figure S4). We also found that mutual information between cirri  
431 was higher in general, with many pairs of cirri sharing higher mutual information than the  
432 highest values obtain in untreated cells (Figure 5H, Figure S4). This increase in cirral activity  
433 and correlations is consistent with the fibers playing a role in conveying inhibitory information  
434 during unperturbed walking. In further support of this inhibitory role, we found that paclitaxel  
435 treatment also caused an overall increase in mutual information of pairs of cirri (Figure 5H).

436 Next, we investigated how the dynamics of gait state transitions were affected. Following  
437 our previous analysis, we evaluated gait state transitions for the presence of broken detailed  
438 balance, separating state transitions into balanced and unbalanced transitions and found that the  
439 structure of state transitions differed greatly from that of unperturbed cells. Although some gait  
440 state such as 1, 2, and 17 were involved in high frequency transitions in both conditions, gait  
441 state transitions of cells with perturbed fiber systems exhibited less broken detailed balance and  
442 closer to equilibrium-like dynamics as indicated by an entropy production rate of 0.1 nats  
443 (compared to 0.4 nats in the unperturbed case), including the loss of the unbalanced, cyclic  
444 transitions (Figure S4). Figure 5I summarizes the change in the structure of gait state transitions  
445 including changes in broken detailed balance, reduction in transitions toward the states  
446 previously involved in cyclic transitions, and the reduction in the occupancy of states associated  
447 with the cloud of states involved in substantial cell movement, with only 10 of the original 21  
448 cloud states sampled. We also noted that many of the new highest probability transitions feed  
449 gait state 18 (Figure 5I, Figure S4), which involves nearly exclusive activity in cirri f and g  
450 located close to one another at the edge of the cell. A persistent bias toward activation of these  
451 cirri, which are farthest from the central axis of the cell, may in part explain the increase in  
452 turning in trajectories. These results, in conjunction with the fact that cell velocities were  
453 indistinguishable control conditions (Figure S4) are consistent with predictions from simulations

454 in which shuffling the order of gait state transitions reduced processivity without affecting speed  
455 (Figure 3N,O).

456           Although the result that disrupted gait coordination involves increased mutual  
457 information between cirri, note that this increase is due to more frequent joint activation or  
458 synchronous movements among cirri and so stems from reduced complexity of gait dynamics.  
459 For a complementary perspective linking these changes in gait dynamics to an underlying  
460 computational process, we applied the Causal State Splitting Reconstruction (CSSR) algorithm  
461 to construct  $\epsilon$ -machines corresponding to walking cells<sup>48,89</sup>.  $\epsilon$ -machines are automaton models  
462 consisting of a set of causal states with transitions between them and represent the minimal  
463 model consistent with accurate prediction of a stochastic process<sup>48</sup>. The causal states of an  $\epsilon$ -  
464 machine indicate how the process from which it is constructed stores information, and state  
465 transitions indicate how the process transforms information<sup>48</sup>. We found that  $\epsilon$ -machines  
466 constructed from the cirral activity of untreated cells tended to be similar to one another and  
467 were more complex in terms of having more causal states and transitions than those constructed  
468 from nocodazole treated cells, which also tended to be similar to one another (Figure S5, Method  
469 Details). This reduction in complexity may reflect reduced computational capacity of the  
470 nocodazole treated cells. Further, in conjunction with the decrease in entropy production under  
471 nocodazole treatment, these results are consistent with recent findings linking increases in  
472 broken detailed balance to increases in information processing in biological systems<sup>90</sup>.

473           As a final additional test of the role of the fibers in mediating gait coordination, we  
474 revisited historical microdissection experiments. Although Taylor first reported in 1921 results of  
475 microdissection experiments indicating a role of the fiber system in mediating gait coordination  
476<sup>84</sup>, a reproduction of these experiments in 1966 with improved physiological conditions and  
477 quantitative analysis failed to observe disrupted coordination among cirri upon bisection of cells

478 <sup>85</sup>. Importantly, neither of these reports involved analysis of walking behavior. We performed  
479 microdissections on cells using pulled quartz microneedles, severing cells transversely just in  
480 front of cirrus h, ensuring that we had severed all fibers associated with cirri j-n (Figure 5J,K).  
481 Similar to previous reports, we found that cell fragments regained spontaneous cirral activity  
482 after a brief recovery period. After 24 hr, we found that anterior portions of cells began to exhibit  
483 spontaneous walking activity (Figure 5K,L, Video S6), which persisted for up to 72 hr  
484 subsequently and has not been previously reported. Although these fragments were able to walk  
485 across surfaces, in all cases, they walked along curling or circular trajectories reminiscent of  
486 nocodazole treated cells except in the reverse direction (Figure 5L, Video S6). We analyzed the  
487 cirral dynamics of 10 fragments and found significantly higher mutual information shared  
488 between cirri indicating more synchronous cirral activity, similarly microtubule inhibitor treated  
489 cells, compared to cells that were merely wounded and displaying apparently normal motility  
490 (Video S7) or unperturbed ( $p < 0.001$  in both cases by Wilcoxon rank sum test), which displayed  
491 values consistent with one another (Figure 5M). As with the microtubule inhibitor experiments,  
492 these results are consistent the fibers playing an inhibitory role in gait coordination.

493 Taken together, these results are consistent with our hypothesis that the fiber system  
494 mechanically mediates gait coordination. Further, these results provide additional evidence that  
495 proper, active coordination of cirral dynamics and emergent gait states and gait state transitions  
496 is required for proper cellular walking.

## 497 **Discussion**

498 Faced with the challenge of accounting for the emergence of apparently sophisticated  
499 cellular behavior, the directed walking of *Euplotes* driven by a seemingly disordered gait, we  
500 conceptualized the cell as a finite state machine. Traditionally, studies of computational  
501 processes performed by cells have focused on combinatorial logic, where the output of a

502 computation depends only on the current input, performed by networks of molecules in cells  
503 <sup>25,31–33</sup>. We have focused on sequential logic, where outputs depend on the system state as well,  
504 an equally important aspect of the theory of computation with notable yet less developed  
505 representation in studies of cellular dynamics <sup>16,20,91</sup>. Automata theory, which includes finite state  
506 machine models and necessarily involves sequential logic, provides tools for understanding  
507 structure and stereotypy in transitions between dynamical states, increasingly appreciated as  
508 features of the behavior of eukaryotic cells. Our approach revealed modularity in cellular  
509 dynamics associated with structural modularity of the cell (Figure 2, 4) in addition to stereotyped  
510 patterns of sequential activity (Figure 3) and yielded new insight into regulatory mechanisms  
511 (Figure 3, 5).

512           Related approaches involving the coarse-graining of complex dynamics and subsequent  
513 analysis have proved useful in revealing simplicity and stereotypy in the behavior and movement  
514 patterns of various organisms including flies, worms, and protists<sup>3,5,65,66,92</sup>. Reducing the  
515 complexity of biological dynamics in this way can be an important step toward making  
516 quantitative predictions and for interpreting the effects of perturbations. In general, particular  
517 approaches to coarse-graining will depend on details of the biological system, type of data  
518 collected, and underlying patterns in the data. The specific steps we have taken in the present  
519 study are best suited to biological processes that can be characterized in terms of discrete events.  
520 The analyses following coarse graining stand to provide the most insight into processes  
521 involving information processing where the sequential order of events may be important to the  
522 resultant function. Additionally, our perturbative experiments demonstrated how these  
523 approaches can drive mechanistic insight by helping connect function and computation to  
524 underlying mechanics and physiology.

525           Although there are examples of locomotor coordination reminiscent of the stochastic,  
526 non-equilibrium gait dynamics of *Euplotes*, such as gait switching in Kangaroo rats <sup>52</sup> or, most  
527 saliently, gait switching in an octoflagellate <sup>5</sup> and motility in cultured mammalian cells <sup>44</sup>,  
528 walking locomotion in *Euplotes* represents a departure from many of the best studied appendage-  
529 based locomotor systems. For example, limbed locomotion in animals tends to proceed by highly  
530 stereotyped, determinate patterns of activity <sup>58,62</sup>, and many small, aquatic animals exhibit  
531 periodic movements of appendages, often cilia, during locomotion <sup>7,63,93</sup>. Many forms of  
532 unicellular locomotion involve such dynamics as well including in sperm cells <sup>94</sup>, diverse  
533 flagellates with various numbers of flagella <sup>63</sup>, and ciliates <sup>63,95,96</sup>. Even in cases where cellular  
534 locomotion involves fundamentally stochastic dynamics such as in run-and-tumble motility in *E.*  
535 *coli* <sup>12</sup> or analogous behaviors observed in protists <sup>11,97-99</sup>, motility can be described by  
536 equilibrium processes <sup>5</sup>, in contrast to the non-equilibrium character of the gait of *Euplotes*.

537           Here, broken detailed balance in gait state transitions revealed cyclic activity with a  
538 mixture of stereotypy and variability in the gait of a single cell (Figure 3). To explain how these  
539 dynamics give rise to directed walking, we propose a mechanism, captured by our biophysical  
540 model, in which biased, actively controlled cyclic transitions serve to establish strain, effectively  
541 storing stress, in certain cirri, and the spontaneous release of these cirri from the substrate, during  
542 a series of unbiased gait state transitions, allows the cell to move forward. The cloud of unbiased  
543 transitions associated with substantial cellular movement is consistent with motility generation  
544 not depending on the precise order in which the strained cirri are released from the substrate.  
545 Return to the cycle states then are necessary to establish this process anew by winding up the  
546 system for continued, proper cell movement. Disruption in this resetting may lead to defects in  
547 walking as predicted by simulations (Figure 3K-O, 5) and with the reduction in entropy  
548 production and loss of the cycle states in irregularly walking cells with disrupted fiber systems,

549 which appeared unable to consistently maintain linear trajectories (Figure 5B,D,I, Video S4). We  
550 find additional experimental support for our proposed mechanism in previously reported  
551 observations of cyclic velocity fluctuations in the trajectories of walking *Euplotes* <sup>36</sup>.

552 We argue that subcellular processes are involved in actively coordinating cirri and  
553 propose that broken detailed balance in the gait of *Euplotes* indicates this active coordination.  
554 The results of experiments perturbing the tubulin-based cytoskeletal fiber system are consistent  
555 with its role in mechanically mediating communication both among cirri and between cirri and  
556 the cell cortex (Figure 4,5). We conjecture that movement of cirri relative to one another can  
557 establish tension in the fiber system and that the tension state of fibers associated with each  
558 cirrus may then modulate cirral activity in a manner reminiscent of basal coupling in flagellates  
559 <sup>22</sup>. Further, It is possible that microtubules may mechanically mediate the coordination of cellular  
560 processes in other eukaryotes, and microtubules in cells have recently been shown to respond  
561 directly to mechanical forces <sup>100</sup>. Microtubules have also been shown and proposed to be  
562 involved in more complex signal transduction pathways<sup>101,102</sup>. Changes in fiber length, as  
563 observed under nocodazole treatment, change the relative positions of cirri, which could lead to  
564 different distributions of tension and thereby induce the altered pattern of state transitions and  
565 associated walking defects. Our results show that perturbation of the fiber system shift the gait of  
566 *Euplotes* from a regime of asynchronous yet coordinated movement to a dysregulated regime  
567 with synchronous yet improperly coordinated movement. It should be noted, however, that the  
568 fact that cells with perturbed fiber systems, including bisected cells, display some walking ability  
569 implicates additional robustness and complexity in mechanisms of gait coordination and cell  
570 motility. Although details of the mechanism remain to be fully explored and tested, our results  
571 are consistent with the fibers system playing an active and inhibitory role in gait coordination.  
572 Thus, by combining information processing to properly dictate patterns of cirral activity and the



573 mechanical actions of cirral movement, walking *Euplotes* embodies the sequential computation  
574 of a finite state machine. Furthermore, our approach to understanding a complex cellular  
575 behavior, grounded in theory of computation, allowed us to derive mechanistic insight from  
576 observational and perturbative experiments. Because reproducible biological function often  
577 emerges from the productive management of stochastic fluctuations, we expect our conceptual  
578 and analytical approaches may be useful in studying other living systems.

579 Our work lays a foundation for studies of sensorimotor behavior in *Euplotes*, which we  
580 believe will shed light on principles of cellular behavior. We have focused here on a single  
581 behavior (spontaneous, linear walking), but *Euplotes* exhibits a complex behavioral repertoire in  
582 response to diverse environmental cues, contexts, and physiological states<sup>39,40,103,104</sup>. Many of  
583 these behaviors involve different patterns of cell motility. Our biophysical model of cell walking  
584 could help predict and interpret how changes in gait state transitions or the emergence of new  
585 gait states might give rise to these different patterns of movement. We speculate that the unusual  
586 gait of *Euplotes* and associated asymmetric cell structure, contrasting sharply with deterministic  
587 appendage movements and symmetric structure in animals and many swimming flagellates and  
588 ciliates, may reflect physical and phylogenetic constraints. The framework we have developed  
589 integrates across scales of space, time, and biological organization to link mechanics and  
590 subcellular dynamics and structure to overall cell movement patterns. Therefore, our work  
591 provides a way to begin to address the functional significance of cell morphology, gait patterns,  
592 and mechanisms of gait control, and in conjunction with comparative approaches, could provide  
593 new insight into how cellular behavior evolves.

594 Among the domains of life, eukaryotes uniquely display remarkable complexity and  
595 diversity in cellular behavior<sup>105</sup>. Our approach, grounded in finite state machine analysis, has  
596 revealed modularity and stereotypy underlying complex cellular behavior and has provided

597 insight into regulatory mechanisms across scales of biological organization. Our results suggest  
598 that integrating approaches from theoretical computer science, non-equilibrium statistical  
599 physics, and cell biology stands to shed light on the regulation of cellular behavior in eukaryotes  
600 more broadly. By revealing principles of cellular behavior, the line of research established here  
601 stands to advance our ability to predict, understand, and even one day engineer cellular behavior  
602 across diverse eukaryotic systems.

603

604

605

## Figures

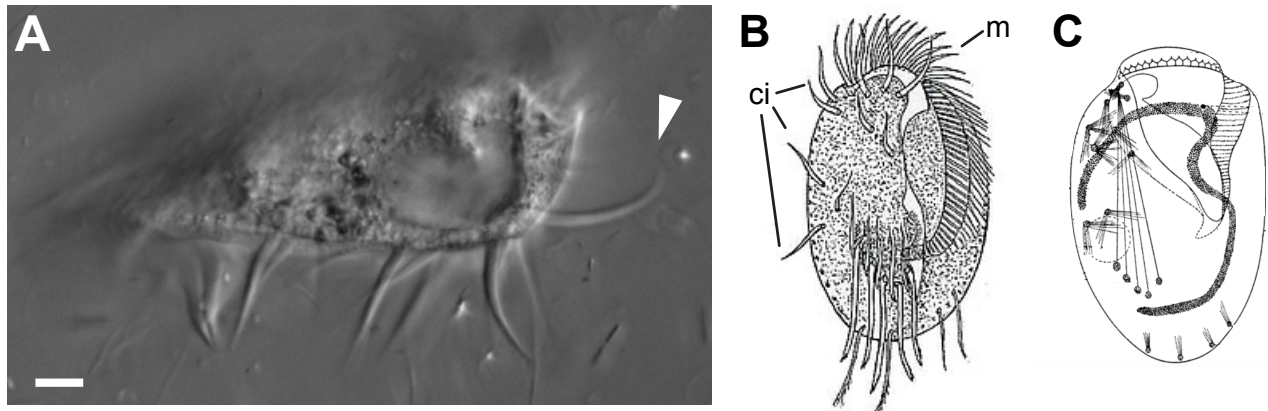

606

607

**Figure 1. *Euplotes* exhibits highly polarized, complex cellular architecture and walks across surfaces using microtubule-based organelles called cirri, some of which are physically**

608

**linked.** (A) A single *Euplotes eurystomus* cell in profile displays its ventral cirri, which are used for walking locomotion across surfaces (arrowhead indicates a single cirrus stretching out from

610

the cell). Scale bar is 10  $\mu\text{m}$ . (B) A drawing of a *Euplotes* cell, viewed from the ventral surface, highlighting the complex, asymmetric structure of the cell. Notable features include the cirri (ci)

612

and the membranellar band (m), wrapping from the top of the cell to the center, which is used to generate a feeding current to draw in prey items. Drawing adapted and obtained from Wikimedia

614

Commons, from original source <sup>106</sup>. (C) A drawing of a *Euplotes* cell, highlighting the fiber

615

system associated with the cirri, historically referred to as the neuromotor apparatus. Drawing adapted from <sup>107</sup>.

616

617

618

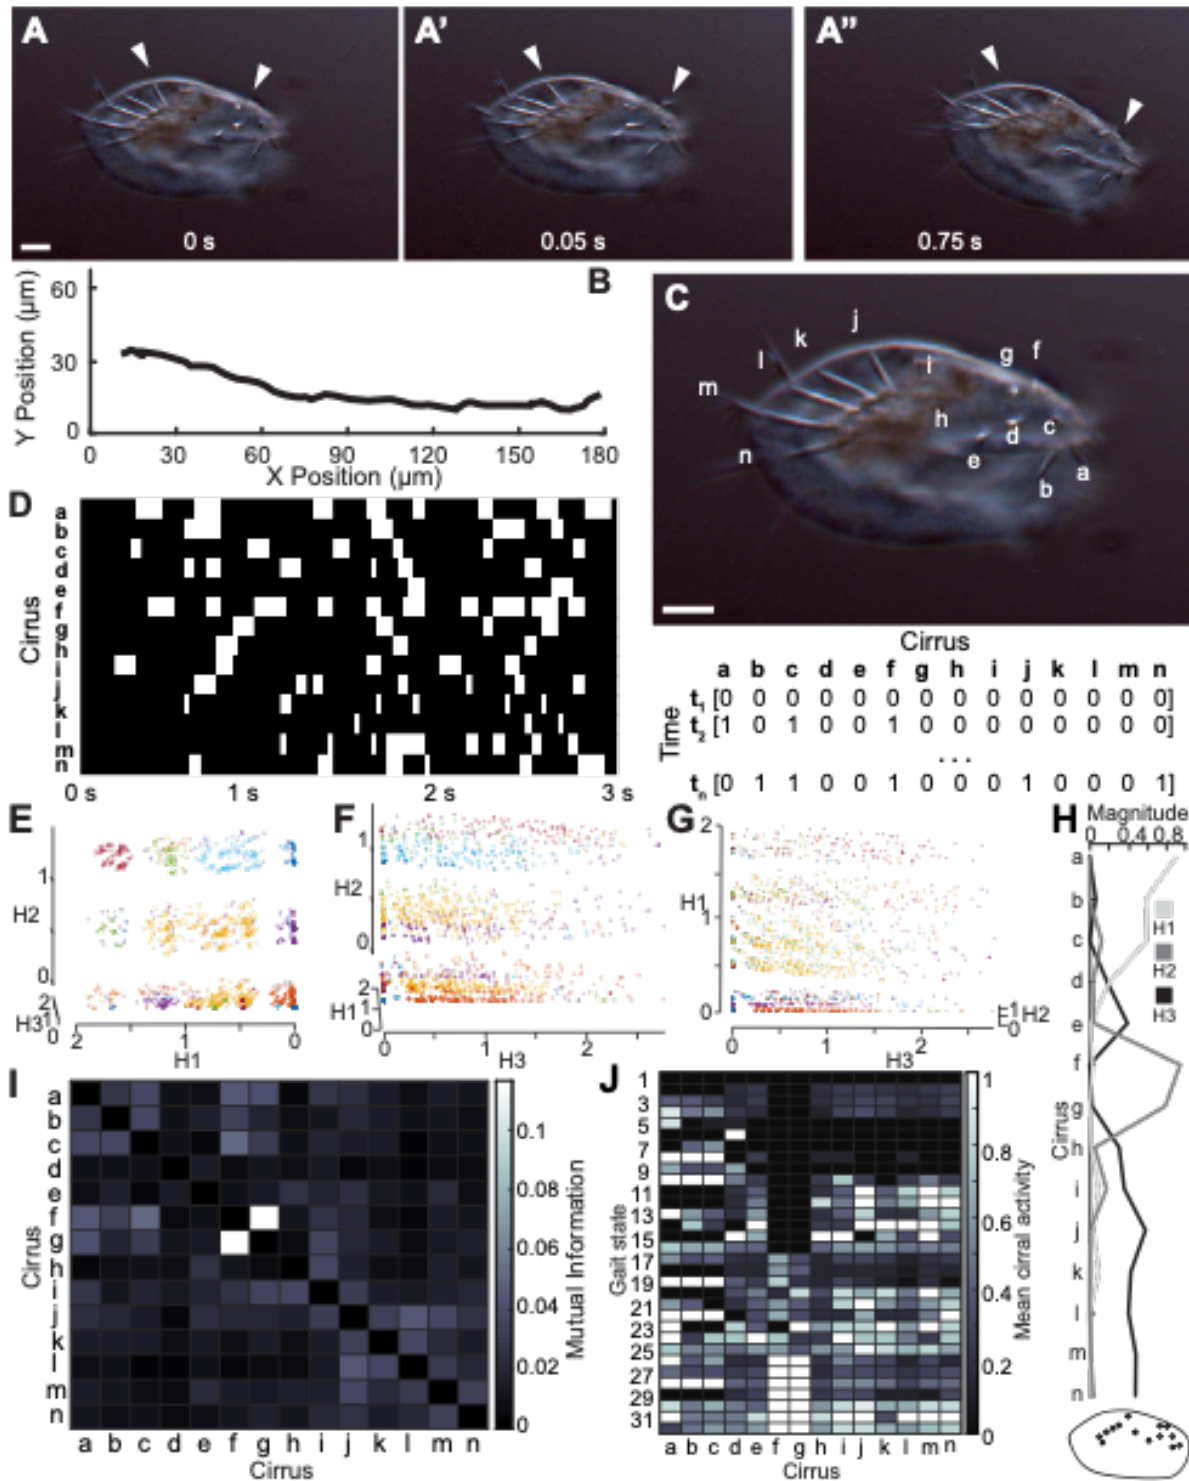

619

620

621

622

**Figure 2. *Euplotes* walks across surfaces according to a complex gait, which can be described in a discrete, reduced state space with gait states corresponding to identifiable patterns of cirral activity. (A-A''), The movements of cirri during walking locomotion are**

623 clearly visible by brightfield microscopy by focusing on a plane at the surface of the coverslip on  
624 which cells are walking. Three snapshots depict different time points during a single walking  
625 trajectory, and white arrowheads indicate cirri. In the panels from left to right, the cirrus  
626 indicated by the arrowhead on the left is stationary, stationary, and then moving, and the cirrus  
627 indicated by the arrowhead on the right is stationary, moving, and then stationary. Scale bar is 15  
628  $\mu\text{m}$ . (B) The trajectory of a cell during a single recorded trajectory as the cell walked across a  
629 coverslip from left to right. The cell position was manually tracked in each frame. (C) The  
630 scheme for encoding cirral dynamics during walking involved labeling each of the 14  
631 distinguishable ventral cirri (a-n), and recording cirral activity in each frame, corresponding to  
632 timepoints ( $t_1, \dots, t_n$ ), of recordings of walking cells as a 14-bit binary vector. Each entry in each  
633 vector is given a value of either 0 if the cirrus is not moving and in contact with the coverslip or  
634 1 if the cirrus is moving. Scale bar is 15  $\mu\text{m}$ . (D) Representative visualization of cirral dynamics  
635 for a single trajectory of a walking cell. These dynamics correspond to the walking trajectory in  
636 panel E. Each row corresponds to a cirrus and each column is a single video frame. White  
637 denotes cirral activity, a value of 1, in the vector encoding of dynamics from panel F. Note the  
638 dynamical complexity and discrete, stepping-like nature of cirral movements. (E-G) Three  
639 roughly orthogonal views of a plot displays the structure of all recorded cirral dynamics, encoded  
640 as in panel E, from 13 cells over 2343 timepoints in a reduced state space obtained by non-  
641 negative matrix factorization (NMF). Axes correspond to the components of the NMF (H1, H2,  
642 H3), and each point is a single timepoint. Randomized colors highlight the 32 clusters identified  
643 using the density-based spatial clustering of applications with noise (DBSCAN) algorithm<sup>70</sup>. We  
644 refer to these clusters as gait states, and they correspond to unique configurations of cirral  
645 activity during walking locomotion. (H) A plot of the magnitudes associated with each cirrus  
646 corresponding to the components of the NMF of cirral dynamics shows distinct contributions

647 from spatially distinct groups of cirri. Component H1, for example, is associated with activity in  
648 cirri a, b, and c. The tracing of a cell including the position of cirri has the same color map as the  
649 plot above and shows the grouping of the cirri corresponding to each component. (I) A heatmap  
650 of mutual information between all pairs of cirri shows that correlations in cirral activity  
651 correspond to the NMF components displayed in panel K. For example, cirri a, b, and c share  
652 mutual information with one another and are the cirri contributing to component H1. (J) A  
653 heatmap representation of the cirral activity associated with each of the 32 gait states. Values for  
654 each cirrus are the mean over all instances of the gait state. Note that each gait state has a unique  
655 signature of cirral activity. See also Figure S1, Video S1, and Video S2.

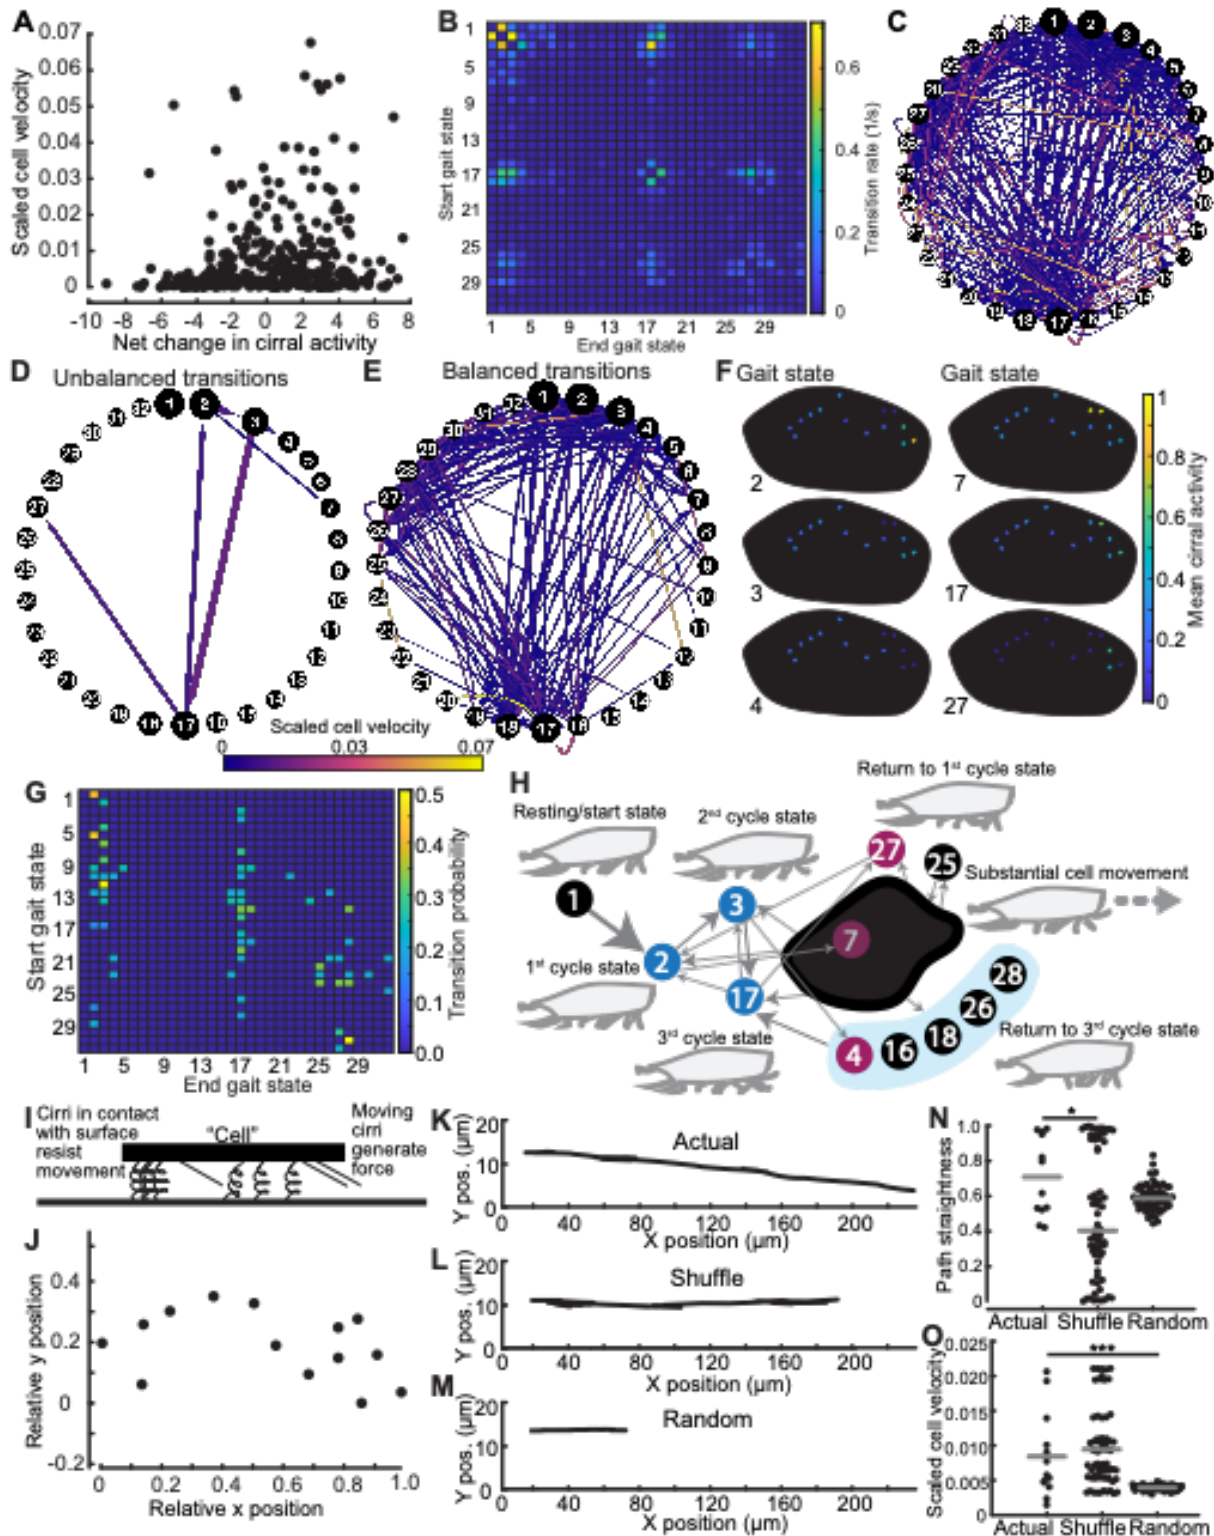

656

657

658

**Figure 3. *Euplotes* walks with a cyclic stochastic gait exhibiting broken detailed balance, stereotypy, and state machine-like dynamics. All data for panels A-H are pooled**

659 from the walking trajectories of 13 different cells over 2343 timepoints and 1423 pairwise gait  
660 state transitions. (A) A plot of the mean net change in cirral activity versus the net scaled cell  
661 velocity associated with all transitions between the 32 gait states identified in Figure 2 shows  
662 that the change in number of active cirri is not strongly correlated with cell velocity ( $R^2=0.03$ ).  
663 Cell velocities were obtained from manually tracked walking trajectories and then scaled by  
664 dividing frame to frame displacements for each trajectory by the length of the cell being tracked  
665 and also dividing by the average frequency of cirral inactivity. Scaling provided a non-  
666 dimensional velocity scaled by natural units of the system. Note that at low Reynolds number,  
667 velocity should be proportional to force<sup>43</sup>, so this plot also reflects the net walking force  
668 generated by the cell. Net change in cirral activity was computed using the data presented in  
669 Figure 2. Note that the largest velocities are associated with small negative and small to  
670 moderate positive net changes in cirral activity. (B) The transition matrix of all gait state  
671 transitions, with rows representing the starting state and columns indicating the ending state,  
672 exhibits broken detailed balance. Rates were estimated by dividing the total number of observed  
673 transitions between each state pair and dividing by the total time observed. Under detailed  
674 balance or equilibrium conditions, transitions from one state to another should be balanced by  
675 reverse transitions. Lack of this kind of reversibility, as seen by the lack of symmetry of the  
676 heatmap across the diagonal, indicates broken detailed balance and non-equilibrium dynamics.  
677 (C) A directed graph representation of all gait state transitions. Nodes correspond to the 32 gait  
678 states, and node sizes are scaled by the proportion of total time cells spent in each state. Directed  
679 edges are represented by arrows between nodes and signify state transitions. The size of the  
680 arrows is scaled by transition rates as in panel b. Edge color represents scaled cell velocity as in  
681 panel A according to the indicated color scale. (D) A subset of transitions visualized as in panel  
682 C shows the restricted and relatively high frequency nature of unbalanced, non-equilibrium-like



683 transitions. Only transitions that were observed to happen more than one time and exhibiting a  
684 significant difference between forward and reverse transitions ( $p < 0.05$  by binomial test, see  
685 Method Details) are displayed. (E) A subset of transitions, similarly to panel d, except that only  
686 the balanced transitions, lacking a significant difference between forward and reverse transitions  
687 ( $p < 0.05$  by binomial test) are displayed, also show a complex and widespread structure, this time  
688 of balanced, equilibrium transitions. Note that the majority of transitions associated with high  
689 cell velocity involve equilibrium-like dynamics. (F) Examples illustrating the spatial  
690 organization of cirral activity corresponding to gait states. Some states, such as 7, correspond to  
691 activity in spatially discrete groups of cirri, while others, such as 17, correspond to cirral activity  
692 across the cell. The gait states displayed here are those involved in unbalanced transitions. (G) A  
693 heatmap of transition probabilities between states, showing only the most probable transitions  
694 from a given state with all others set to zero, shows distinct structure. In cases where multiple  
695 state transitions from a state were tied for the highest probability, all of these transitions are  
696 displayed. Fewer than half of the total states are recipients of multiple high probability  
697 transitions, and many states are the recipients of no high probability transitions. (H) A  
698 representation of functional states and transitions between them highlights the machine-like  
699 nature of the gait of *Euplotes*. Gait states are represented as circles with numerical labels. Blue  
700 circles represent states that are both recipients and sources of unbalanced transitions as identified  
701 in panel D and constitute the three cycle states. Red circles represent states that are recipients but  
702 not sources of unbalanced transitions as identified in panel D. Black circles correspond to gait  
703 states that are associated only with balanced transitions as in panel E. States receiving no more  
704 than one unique high probability transition from states with only a single highest one as  
705 identified in panel g were grouped together into a compound state represented by the dark gray  
706 blob. The blue background behind states 4, 16, 18, 26, and 28 indicates that these states all share

707 the same highest probability transitions between states identified in this panel, and thus, the  
708 group constitutes a single compound functional state. Arrows represent the highest probability  
709 transitions between the states, including compound states composed of multiple gait states as  
710 identified in Figure 2 (dark gray blob and blue background). Gait state 1 is also depicted, as it is  
711 the state in which cells spent the most time over all walking trajectories and also is uniquely the  
712 state from which cells begin walking. Cells also frequently return to the state during walking.  
713 Further, transitions from gait state 2 from gait state 1 constitute the single highest frequency  
714 transition. Together, all identified states in this panel constitute functional states. Arrows  
715 represent the most probable transitions between functional states, and all unbalanced transitions  
716 are also represented with size scaled by their proportional probability compared to all other  
717 transitions emanating from the source functional state. Cartoons are a walking cell in profile with  
718 cirri in a configuration representative of the corresponding functional state. Labels refer to the  
719 apparent functional role of states and their associated transitions. Beginning from gait state 1, the  
720 resting/start state, cells are most likely to follow transitions from gait state 2 to 3 to 17 at which  
721 point cells are likely to enter the functional state associated with substantial cell movement  
722 involving variable balanced transitions between a number of gait states. Transitions are then  
723 likely to lead back toward the cycle states. Note that while this representation of gait dynamics  
724 highlights the most probable transitions, substantial variability, primarily involving reversible  
725 transitions, occurs during walking trajectories. (I) A cartoon depicts the basic features of our  
726 model of a walking cell. Cirri generate a constant force when moving and resist displacement in  
727 a spring-like fashion when in contact with the substrate. Force and torque balance yield cell  
728 displacement and orientation in each simulation timestep. (J) A plot of the relative average  
729 resting cirral-surface contact positions measured from the 13 cells used for gait analysis, which  
730 were used for all simulations and define simulated cell position and orientation. (K) A

731 representative trajectory of a simulation of a walking cell using experimentally recorded cirral  
732 activity illustrates the linear, processive motion, which matches experimentally measured cell  
733 walking dynamics qualitatively and semi-quantitatively. (L) A representative trajectory of a  
734 simulation of a walking cell using the same experimentally recorded cirral activity as in panel K  
735 but in a shuffled order illustrates a decrease in processivity of cell movement. (M) A  
736 representative trajectory of a simulation of a walking cell with random patterns of cirral activity  
737 with the same average level of cirral activity and the same number of timesteps as in panels k  
738 and l illustrates the decrease in cell speed. (N) A plot of path straightness measured from  
739 simulations using actual cirral pattern measured experimentally (Actual), actual cirral patterns in  
740 a randomly shuffled order (Shuffle), and randomly generated cirral activity with the same  
741 average cirral activity as actual patterns (Random) suggest that the order of gait state transitions  
742 matters for processivity of cell movement due to a predicted decrease in path straightness for  
743 Shuffle trajectories. Path straightness is the distance between the start and end of the cell  
744 trajectory divided by the sum total path length. The trajectories of the 13 cells analyzed for  
745 Figure 2 were used for the Actual simulations. For the Shuffle simulations, cirral activity patterns  
746 from each of the 13 cells were shuffled to generate a random order five times. For the Random  
747 simulations, five sets of patterns of lengths equal to each of the 13 cell trajectories were  
748 generated. The asterisk indicates  $p=0.04$  by the Wilcoxon rank sum test. (O) A plot of scaled cell  
749 velocity for the simulations described for panel k predict that the gait states are responsible for  
750 generating cell velocities as indicated by decreased scaled cell velocity for random patterns of  
751 cirral activity. Scaled velocity was computed as described for panel a and averaged over the  
752 entire cell trajectory. Three asterisks indicates  $p<0.001$  by the Wilcoxon rank sum test. See also  
753 Figure S1 and Figure S2.

754

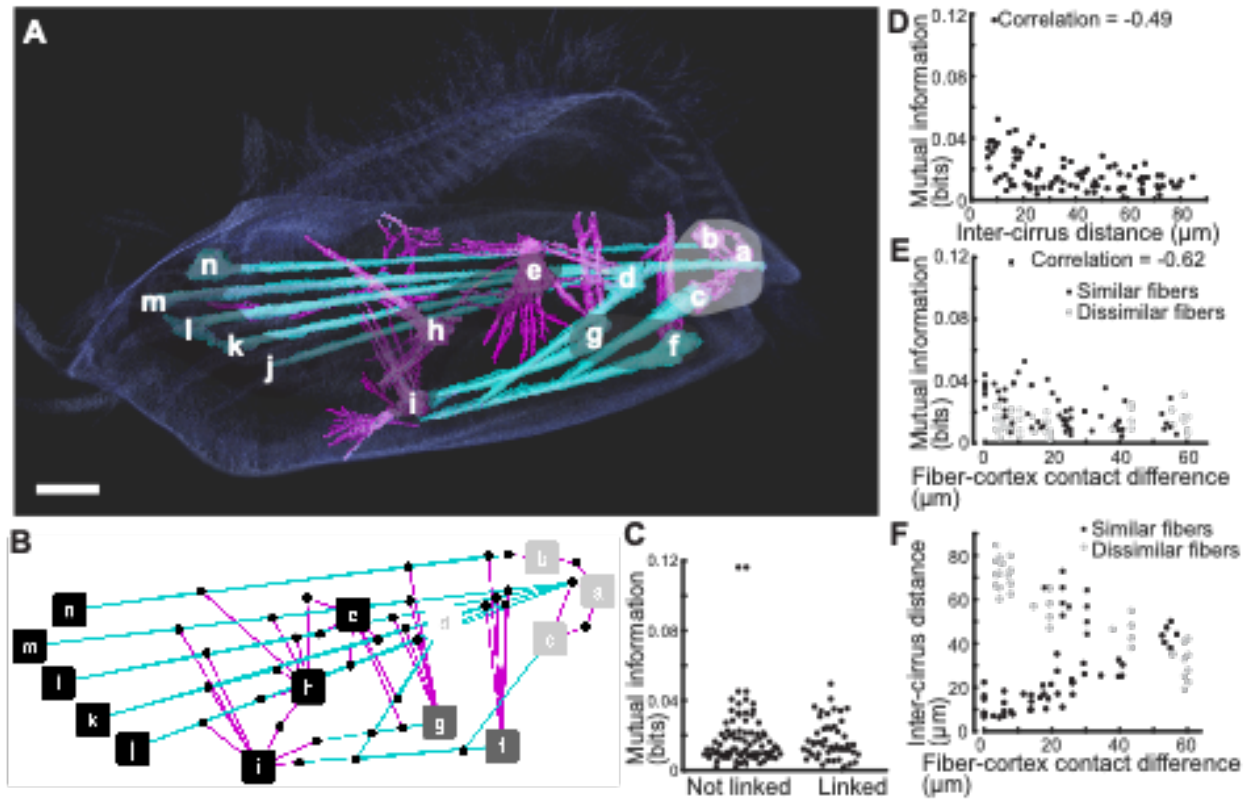

755

756

757

758

759

760

761

762

763

764

765

766

767

**Figure 4. The structure of the complex, interconnected fiber system of *Euplotes* correlates with dynamical associations between cirri.** (A) The SiR-tubulin labeled cell (faint, dark blue) was imaged by confocal microscopy, and a 3D reconstruction as obtained from serial confocal slices. Fibers were manually traced in each slice using TrakEM2 in FIJI. Two morphologically distinct classes of fibers were observed and are indicated as follows: thick, linear fibers are cyan and thinner, filamentous fibers are magenta (see Figure S3 for more image data). Fibers emanate from the base of each cirrus and form a connected network between all cirri. The base of each cirrus is indicated by corresponding letters (as in Figure 2C). Gray shading indicates the dynamical groups identified by dimensionality reduction and follows the same color scheme as in Figure 2H. Scale bar is 10  $\mu\text{m}$ . (B) A graph representation of fiber-fiber connections illustrates the complex and interconnected nature of cirrus associated fiber topology. Nodes correspond to the cirri to which each fiber system is associated, and edges indicate

768 connections between fiber systems. Colors of nodes indicate the same groups as in panel a, and  
769 colors of edges indicate the types of fibers connecting to one another, cyan for thick fiber  
770 connections, magenta for thin fiber connections, and purple for thick to thin fiber connections.  
771 (C) Pairs of cirri that are linked by fiber-fiber contacts show no statistically significant difference  
772 in mutual information compared to those lacking fiber-fiber contacts. The plot displays mutual  
773 information between all pairs of cirri grouped by the absence (Not linked) or presence (Linked)  
774 of associated fiber-fiber connections. Statistical significance was evaluated by the Wilcoxon rank  
775 sum test. Note that when pairs of cirri were grouped by fiber-fiber connection type, we did  
776 observe an increase in mutual information for cirri associated with only thin fiber-fiber  
777 connection and only thick fiber-fiber connections compared to those lacking fiber-fiber  
778 connections (see Figure S3). (D) A plot of mutual information as a function of inter-cirrus  
779 distance displays negative correlation, with a Spearman correlation coefficient of -0.49  
780 ( $p < 0.001$ ). Plotted values are defined with respect to pairs of cirri. (E) A plot of mutual  
781 information as a function of fiber-cortex contact distance grouped by fiber type similarity and  
782 lack thereof displays negative correlation, with a Spearman correlation coefficient of -0.62  
783 ( $p < 0.001$ ) for pairs of cirri with similar fiber types and no significant correlation for those with  
784 dissimilar fiber types. Similarity of fiber types is defined in terms of sharing at least some fiber  
785 types as defined in panel A. Fiber-cortex contact difference is measured by the mean cross  
786 nearest neighbor distance (see Method Details) for all fiber-cortex contact points associated with  
787 each cirrus. The negative correlation values from the data plotted in panels D and E indicate that  
788 cirri that are closer to one another and also cirri with fiber-cortex contacts in nearby regions of  
789 the cell tend to have higher mutual information, and indeed cirri that are both close to one  
790 another and with similar patterns of fiber-cortex contacts display the highest mutual information.  
791 (F) A plot of fiber-cortex contact difference versus inter-cirrus difference (as in panels D and E)

792 illustrates that nearby cirri tend to have similar associated fiber-cortex contacts, highlighting that  
793 nearby cirri with similar fiber-cortex contacts share the most mutual information. See also Figure  
794 S3.

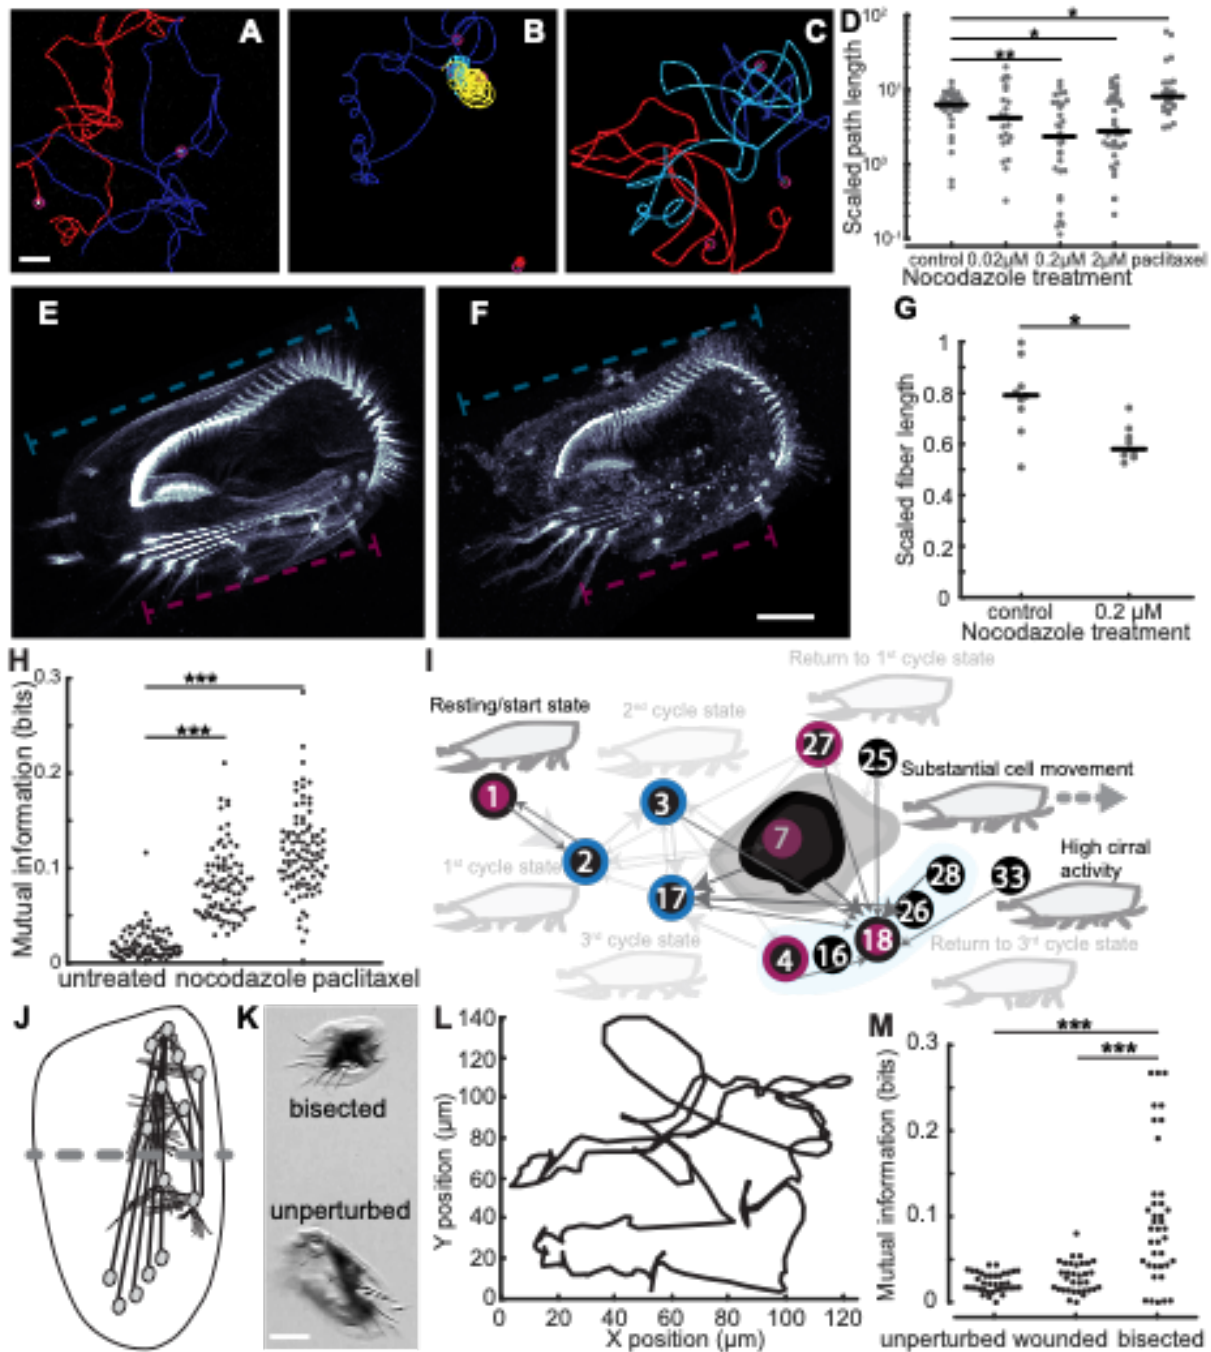

795

796

797

798

799

800

**Figure 5. The fiber system of *Euplotes* mediates gait coordination.** (A-C) Representative cell motility trajectories of cells imaged under darkfield illumination and tracked using the TrackMate plugin in FIJI<sup>108</sup> in control (A), nocodazole treated (B), and paclitaxel treated (C) cells highlight the increased turning causing curved and curled trajectories in cells treated with the microtubule polymerization inhibitor nocodazole and decrease in turns leading to smoother,

801 less convoluted trajectories in cells treated with the microtubule stabilizer paclitaxel. Different  
802 colors represent the trajectories of different cells. Scale bar is 500  $\mu\text{m}$ . (D) Nocodazole affects  
803 cell motility in a dose dependent and specific manner. Motility was quantified by the scaled path  
804 length, which is the total integrated distance walked by a cell scaled by the maximum distance  
805 the cell travelled from its starting point. This scaled path length decreases with a decrease in  
806 long, straight segments of trajectories corresponding to normal cell walking. Scaled path length  
807 decreased with increased nocodazole concentration, becoming significantly less than controls by  
808 0.2  $\mu\text{M}$  nocodazole. Note that at 2  $\mu\text{M}$  nocodazole, cells were often observed to swim instead of  
809 walk, which may account for the lack of decrease in scaled path length compared to 0.2  $\mu\text{M}$   
810 treatment. In contrast to nocodazole, treatment of cells with 0.02  $\mu\text{M}$  paclitaxel, which stabilizes  
811 microtubules, increases scaled path length compared to the control. The trajectories of at least 20  
812 cells were analyzed for each condition. The black bars are median values. A single asterisk  
813 indicates  $p < 0.05$ , and a double asterisk indicates  $p < 0.005$ , as computed by a Wilcoxon rank-sum  
814 test. (E,F) Representative images illustrating the effect of the inhibition of microtubule  
815 polymerization by nocodazole on the fiber system and approach to quantifying this effect.  
816 Images are maximum intensity projections of confocal z-stack images of cells labeled by SiR-  
817 tubulin. Scale bar is 20  $\mu\text{m}$ . (G) A plot showing that nocodazole treatment shortens fibers  
818 compared to controls. Scaled fiber length was measured by dividing the length of the longest  
819 fiber by the length of the entire cell. Nine cells were analyzed for each condition. The black bars  
820 are median values. A single asterisk indicates  $p < 0.05$  as computed by a Wilcoxon rank-sum test.  
821 (H) A plot of mutual information of all pairs of cirri shows that treatment of cells with the  
822 microtubule inhibitors nocodazole and paclitaxel change the distribution of mutual information  
823 due to an overall increase in cirral synchrony compared to untreated cells. The data for untreated  
824 cells is that from Figures 2 and 3. Nocodazole treatment was 0.2  $\mu\text{M}$ , and 6 cells over 1133



825 timepoints were analyzed. Paclitaxel treatment was 0.02  $\mu\text{M}$ , and 6 cells over 441 timepoints  
826 were analyzed. Three asterisks indicates  $p < 0.001$  as computed by a two sample Kolmogorov-  
827 Smirnov test. (I) A representation of the changes in the nature and organization of functional  
828 states as well as transitions between them highlights the effects of nocodazole treatment. This  
829 panel is partially adapted from Figure 3H and was produced by following the same analysis  
830 procedure. Any functional states and transitions depicted in Figure 3H no longer observed under  
831 nocodazole treatment appear faded. Arrows that are not faded represent the new highest  
832 probability transitions associated with the states. Outer colors of the nodes corresponding to the  
833 numbered gait states denote the type or absence of broken detailed balance associated with the  
834 gait state for untreated cells while the core color represents that for the treated cells. As in Figure  
835 3H, black denotes the lack of unbalanced transitions, red denotes the state is only a source or  
836 only a recipient of unbalanced transitions, while blue denotes states which are both sources and  
837 recipients of unbalanced transitions. Note the loss of the cycle states as well as the functional  
838 states directing return to the cycle states, the emergence of the high cirral activity state involving  
839 activity in nearly all cirri, the reduction in gait states associated with the cloud of states of  
840 substantial cell movement (indicated by the reduction in the size of the black blob), and the  
841 emergence of many high probability transitions to gait state 18. (J) A cartoon illustrates the  
842 location of the cuts made for microsurgery experiments (dashed gray line). (K) A representative  
843 image shows a recovered bisected cell and a fully intact, unperturbed cell for reference. Scale bar  
844 is 50  $\mu\text{m}$ . (L) A plot of the manually tracked trajectory of a walking, bisected cell illustrates the  
845 unsteady, curving manner of cell movement. (M) A plot of mutual information of all pairs of  
846 cirri h-n for unperturbed, wounded, and bisected cells demonstrating a change in the distribution  
847 of mutual information only in the case of bisected cells where fibers associated with h-n have  
848 been severed. Three asterisks indicates  $p < 0.001$  as computed by a two sample Kolmogorov-

849 Smirnov test. The data for unperturbed cells is that from Figure 2, and data for wounded and  
850 bisected conditions involved 10 cells over 1308 timepoints in the case of the wounded cells and  
851 1815 timepoints for bisected cells. See also Figure S4, Figure S5, and Videos S3-S7.

852

853

854 **STAR Methods**

855 **Resource Availability**

856 *Lead contact*

857 Further information and requests for resources, data, and code should be directed to and will be  
858 fulfilled by the lead contact, Wallace F. Marshall ([wallace.ucsf@gmail.com](mailto:wallace.ucsf@gmail.com)).

859 *Materials availability*

860 This study did not generate new unique reagents.

861 *Data and code availability*

862 All data reported in this paper will be shared by the lead contact upon request.

863 All original code has been deposited at GitHub and is publicly available as of the date of  
864 publication. DOIs are listed in the key resources table.

865 Any additional information required to reanalyze the data reported in this paper is available from  
866 the lead contact upon request.

867

868 **Experimental Model and Subject Details**

869 Cell lines

870 Cultures of *Euplotes eurystomus* were obtained from Carolina Biological Supply Company (Item  
871 #131480) and were kept at room temperature under ambient light conditions.

872

873 **Method Details**

874 Cell husbandry

875 Individual cells were isolated from cultures, which contained other protists and  
876 meiofauna, by pipetting and placed in non-treated 6-well plates (Thermo Fischer Scientific 08-  
877 772-49) containing spring water taken from cultures. Cells were kept in wells for no longer than

878 five days before imaging, and if cells were to be kept for longer than 48 hours, wells containing  
879 cells were supplemented with 1% Cereal Grass Medium<sup>109</sup> (Thermo Fischer Scientific S25242)  
880 to prevent depletion of prey bacteria and otherwise maintain *Euplotes* under constant growth  
881 conditions.

882

### 883 Live cell brightfield microscopy

884 Cells were concentrated by centrifugation (500×g for 5 min) and resuspended either in  
885 0.5 mL of spring water in coverglass bottomed FluoroDishes (World Precision Instruments  
886 FD35-100) or in 0.2 mL spring water on a coverslip (FisherScientific, 12-545-D) for imaging.  
887 No more than three cells were kept in 0.5 mL imaging samples and only one cell was ever kept  
888 in 0.2 mL imaging samples in order to minimize cell-cell interactions. Cells were observed to  
889 exhibit spontaneous walking activity on coverglass. Walking cells in FluoroDishes were imaged  
890 under brightfield illumination using a Zeiss Z.1 Observer and Hamamatsu Orca Flash 4.0 V2  
891 CMOS camera (C11440-22CU) with a 20x, 0.8 NA Plan-Apochromat (Zeiss) objective. Cells on  
892 coverslips were imaged under brightfield illumination with coverslips inverted over a well  
893 containing a small amount of distilled water to reduce evaporation using a Zeiss Axio Zoom.V16  
894 and a PCO pco.dimax S1 camera. Importantly, in both imaging systems, the focal plane was set  
895 at the interface between cirri of walking cells and the glass surface upon which they were  
896 walking. Images were acquired at 0.033 seconds per frame with a 0.005 second exposure in order  
897 to capture all cirral dynamics during walking with minimal blur.

898

### 899 Quantification of walking dynamics

900 Movies of walking cells were viewed using FIJI<sup>110</sup>. Movement of cirri, or lack thereof  
901 was clearly visible in each movie frame (see Figure 2A and Video S1). The dynamical state of

902 each cirrus in each movie frame was manually annotated. For each frame, each cirrus received a  
903 label of “1” if the cirrus was in motion and “0” if the cirrus was not moving and in contact with  
904 the coverslip. Motion of cirri was evident in terms of a change in cirrus shape or tip position  
905 often in addition to blur due to motion during image acquisition or position out of the focal plane  
906 (see Figure 2A and Video S1). While only slowly walking cells were recorded, sometimes cells  
907 nevertheless exhibit brief, spontaneous departures from slow walking during the course of movie  
908 acquisition. Any frame in which the movement of the cell and/or cirri were too fast to be  
909 resolved, such as during spontaneous escape responses<sup>40</sup> (Video S2), was excluded from  
910 analysis such that some videos were split into a number of separate continuous sequences. Thus,  
911 each movie frame associated with a particular time point in the walking trajectory, with the  
912 exception of those excluded from analysis as described, yielded a corresponding 14-element  
913 binary vector encoding the motility state of the cell in terms of the movement of cirri. Cell  
914 movement was tracked using the manual tracking feature of the TrackMate plugin in FIJI<sup>108</sup>.  
915 The center of each cell was used as the reference feature for tracking. We analyzed the walking  
916 dynamics of 13 different cells.

917

### 918 Dimensionality reduction

919 Dimensionality reduction was performed by non-negative matrix factorization (NMF)  
920 implemented in MATLAB release 2019b (Mathworks, Natick). NMF was chosen as a  
921 dimensionality reduction technique to allow us to obtain a reduced, sparse, and interpretable  
922 representation of walking dynamics. Because NMF derives non-negative factors, the basis  
923 vectors in NMF space correspond straightforwardly to patterns of cirral activity. NMF involves  
924 factoring data,  $A$ , an  $n$  by  $m$  matrix, into non-negative factors  $W$ , an  $n$  by  $k$  matrix, and  $H$ , a  $k$  by  
925  $m$  matrix where the product  $W^*H$  approximates  $A$ . To determine the appropriate number of

926 dimensions or rank,  $k$ , that are necessary to accurately represent the data without overfitting, we  
927 performed cross-validation by imputation with random holdouts <sup>111,112</sup>, also implemented in  
928 MATLAB. We randomly held out 15% of our walking dynamics data, performed NMF for a  
929 given  $k$ , and then used the NMF reconstruction  $W^*H$ , to update the missing data entries. This  
930 process of updating is known as imputation, and we repeated the imputation process 50 times, by  
931 which point the imputed values had stabilized, to obtain a final NMF reconstruction. We then  
932 computed the root mean squared residual (RMSR) between the final NMF reconstruction,  $W^*H$ ,  
933 and our dataset,  $A$ . We performed this entire process 100 times for each value of  $k$ . As is  
934 generally the case for NMF, we observed a monotonic decrease in reconstruction error with  
935 increasing  $k$  without performing the imputation procedure <sup>113</sup> (Figure S1). In contrast to this  
936 trend, we observed an increase in RMSR of imputed values with increasing  $k$  indicating  
937 overfitting <sup>111</sup> (Figure S1). We chose  $k=3$  because this value was the highest value before a  
938 notable increase in imputation error (Figure S1), which would indicate overfitting <sup>111,112</sup>. Thus,  
939 our choice of rank 3 selects the lowest rank approximation that captures structure of the dataset  
940 without overfitting that structure. Further, our choice facilitated the visual inspection of the  
941 structure of data in the reduced dimensional reconstruction.

942 Finally, we noted that for our chosen value of  $k$ , due to the stochastic nature of the NMF  
943 algorithm, which involves a random initialization step, we obtained slightly different solutions  
944 for different iterations <sup>111</sup>. In order to choose the best reduced dimensional approximation,  
945 therefore, we performed NMF 500 times and chose the particular solution corresponding to the  
946 lowest RMSR compared to our dataset.

947

948 Clustering

949 Clustering on the dataset obtained using NMF was performed by density-based spatial  
950 clustering of applications with noise (DBSCAN) algorithm <sup>70</sup> implemented in MATLAB release  
951 2019b (Mathworks, Natick). Structure in NMF space was clearly visible (Figure 2E-G), and  
952 DBSCAN using a Euclidean distance metric, was initially chosen as a clustering method because  
953 it yielded qualitatively good partitioning of the data. The DBSCAN algorithm involves stochastic  
954 search within neighborhoods of a given radius  $\epsilon$  around datapoints, and points with a minimum  
955 number of neighbors,  $n$ , within their neighborhood are grouped as belonging to the same cluster,  
956 leaving two free parameters to determine. We set  $\epsilon$  by first using the  
957 `clusterDBSCAN.estimateEpsilon` function in MATLAB (release 2020b, Phased Array System  
958 Toolbox), which yielded a value of 0.15. We next set about determining the minimum neighbor  
959 number,  $n$ . To do so, we computed the average Silhouette coefficient, a commonly used measure  
960 of clustering quality that indicates how well-separated clusters are <sup>114</sup>, for various values of  $n$ .  
961 The results of this analysis are plotted in Figure S1. Higher Silhouette coefficients indicate better  
962 clustering, and we found that a value of  $n=8$  maximized the mean Silhouette coefficient (Figure  
963 S1). We also noted, however, that for this value, many datapoints were found to be outliers, not  
964 belonging to any cluster due to having too few points within a distance of  $\epsilon$ . Figure S1 displays  
965 percentage of datapoints found to be outliers as a function of  $n$ . In order to avoid categorizing  
966 more than 5% of datapoints as outliers, we chose to settle on  $n=4$ , which does not have a  
967 significantly different mean Silhouette coefficient compared to any of the others in the range  
968  $n=2-7$ . This choice was further supported by the fact that major clusters involving more than 5  
969 datapoints identified with  $n=8$  were also identified with  $n=4$ .

970 Although this set of parameters gave qualitatively and quantitatively reasonable  
971 clustering results, we sought to further refine our clusters and to further reduce the outlier  
972 datapoints. We noted the obvious partitioning of the NMF dataset into three groups along the H2

973 axis (Figure 2E). We found the previously determined parameter values to yield good clustering  
974 for the top and middle partitions ( $H2 \leq 1.1$  and  $0.2 < H2 < 1.1$ ), with no outliers. For the lower  
975 partition ( $H2 \leq 0.2$ ), however, we found that we were able to improve clustering by using  
976  $\epsilon = 0.1182$ . With this updated value, we found no statistically significant change in Silhouette  
977 coefficient and reduced outliers to 0%. The clusters obtained by this process constituted the  
978 identification of the 32 gait states. We note here that the problem of determining the true or  
979 optimal number of clusters is an unresolved problem<sup>115</sup>, and we note that we have followed  
980 standard methods to determine cluster number, and we found that our key results do not depend  
981 sensitively on the precise number of clusters identified (see following section and Figure S1 for  
982 more details).

983

#### 984 State transition analysis

985 Following dimensionality reduction and clustering to identify gait states, we proceeded to  
986 characterize state transition dynamics. For each cell trajectory, we identified all unique gait state  
987 transitions for a total of 1423 unique pairwise transitions over the cumulative 2343 video frames  
988 for 77.14 s of recording. We computed empirical transition rates between states as the total  
989 number of observed transitions divided by the total time of observation. In order to determine  
990 which transitions were balanced and which were unbalanced, we followed Chang and Marshall  
991<sup>45</sup>, and performed binomial tests of statistical significance. Assuming a system at equilibrium,  
992 with all transitions obeying detailed balance, we expect to observe some deviation from exactly  
993 reciprocal transitions and can calculate the probability of observing a given set of ratios given  
994 underlying probabilities of forward and reverse transitions. The binomial probability of  
995 observing a set of transitions with known forward and reverse probabilities is given by

$$996 \quad P(X = f) = \binom{n}{f} p_{forward}^f p_{reverse}^{n-f}$$



997 where  $\binom{n}{f} = \frac{n!}{f!(n-f)!}$  is the number of combinations,  $f$  is the number of forward transitions,  $n$  is  
998 the total number of transitions (such that  $n-f$  is the number of reverse transitions), and the  
999 probabilities  $p_{forward}$  and  $p_{reverse}$  are the forward and reverse probabilities. Considering only  
1000 the set of transitions involving a specific pair of states, and calculating the probability that a  
1001 transition between those states is either in the forward or reverse direction, the values of forward  
1002 and reverse probabilities in the balanced case must be equal such that  $p_{forward} = p_{reverse} = 0.5$ .  
1003 With an  $\alpha$  level of 0.05, we then considered reciprocal transition pairs with binomial  
1004 probabilities less than 0.05 to be significantly unbalanced. Figure S1 displays the binomial  
1005 probabilities associated with all transitions.

1006 In order to calculate the estimated entropy production rate, we followed Wan and  
1007 Goldstein <sup>5</sup>, where the entropy production rate is defined as

1008 
$$\dot{S} = \frac{1}{2} \sum_{i \neq j} J_{ij} A_{ij}$$

1009 with conjugate fluxes  $J_{ij} = p_i k_{ij} - p_j k_{ji}$  and forces  $A_{ij} = \ln \left( \frac{p_i k_{ij}}{p_j k_{ji}} \right)$  where the  $p_l$  are the  
1010 probabilities of being in state  $l$  at steady state and the  $k_{ij}$  are the transition probabilities from  
1011 states  $i$  to  $j$ . We estimate the state occupancy probabilities  $p_l$  as  $\frac{T_l}{T_{Total}}$ , where  $T_l$  is the amount of  
1012 time spent in state  $l$  over all trajectories and  $T_{Total}$  is the total recorded time, and the transition  
1013 probabilities  $k_{ij}$  as  $\frac{N_{ij}}{N_i}$ , where  $N_{ij}$  is the total number of observed transitions from state  $i$  to state  $j$   
1014 and  $N_i$  is the total number of transitions emanating from state  $i$ . To avoid  $k_{ji} = 0$  for pairs of  
1015 states for which we did not observe any transitions during our experiments, we let  $k_{ji} = \frac{1}{p_j T_{max}}$   
1016 where  $T_{max} = 238$  is the maximum number of observed transitions for any single recorded  
1017 walking trajectory.

1018 In the course of our state transition analysis, we also checked whether the waiting times  
1019 between instances of each state might be non-exponentially distributed, with exponential  
1020 distributions indicative of an embedded Markov process or possibly self-organized criticality  
1021 <sup>116,117</sup>. Using the Lilliefors test implemented in MATLAB, we found that in general, waiting  
1022 times were not exponentially distributed, although states 2, 3, 6, 16, 17, 18, 25, 27, 28, 32 were  
1023 found to have waiting times consistent with exponential distributions with Benjamini-Hochburg  
1024 corrected p-values of 0.046, 0.046, 0.022, 0.008, 0.046, 0.017, 0.046, 0.0081, 0.0046, 0.0046  
1025 respectively. Interestingly, none of the waiting times between the movements of individual cirri  
1026 were found to be consistent with exponential distributions. These results are consistent with  
1027 mechanisms constraining the temporal dynamics of cirri and state transitions.

1028 In order to begin evaluating whether state transitions obeyed the Markov property for a  
1029 discrete-time, first-order Markov process, where the transition probabilities from one state to the  
1030 next are completely determined by current state <sup>75,76</sup>, we estimated the transition matrix for  
1031 walking dynamics, consisting of the transition probabilities between all states. We estimate the  
1032 transition probability from state  $i$  to state  $j$  as  $k_{ij} = \frac{N_{ij}}{\sum_k N_{ik}}$  such that  $\sum_i k_{ij} = 1$ . The entries of the  
1033 transition matrix,  $P$ , are these transition probabilities with indices  $i$  for rows and  $j$  for columns. If  
1034 gait state transitions obeyed the Markov property, we expect that the product of the transition  
1035 matrix with itself,  $P^2$ , would be equivalent to the two-step transition matrix where transition  
1036 probabilities are computed as before except that state  $j$  is the state to which  $i$  has transitioned  
1037 after an intervening transition. Figure S1 displays the results of this analysis showing that the two  
1038 matrices show some quantitative and qualitative differences. Although these results strongly  
1039 suggest violation of the Markov property, we applied the Billingsley test for a more statistically  
1040 rigorous evaluation <sup>118,119</sup>. This test was implemented and performed in MATLAB. The  
1041 Billingsley test gives a  $\chi^2$  metric with  $M^2-2M$  degrees of freedom given by

1042 
$$\sum_{i=1}^M \sum_{j=1}^M \frac{(N_{ij} - R_{ij} \sum_{j=1}^M N_{ij})^2}{R_{ij} \sum_{j=1}^M N_{ij}},$$

1043 where  $R_{ij}$ , the independent trials probability matrix, is given by

1044  $R_{ij} = \sum_{k=1}^M N_{kj} / (\sum_{h=1}^M \sum_{l=1}^M N_{hl} - \sum_{k=1}^M N_{ik})$ . Applying this test to our gait state transition data,  
1045 we found that the null hypothesis that the gait conforms to a first-order discrete time Markov  
1046 process was rejected ( $p=0.005$ ).

1047 Importantly, we also noted that the key qualitative results of our state transition analysis  
1048 are robust to the details of clustering results. In particular, we find that strongly unbalanced  
1049 transitions and violation of the Markov property exist for a range of clustering parameters.  
1050 Figure S1 displays the transition matrices for different clustering results.

1051 To arrive at the simplified, state machine representation of the gait, we focused on the  
1052 highest probability transitions emanating from each state. Transition probabilities were estimated  
1053 as  $k_{ij}$  (as defined above). This allowed us to prune away rare transitions in order to reveal the  
1054 dominant structure of gait state transitions. Figure 3G displays the pruned transition matrix as a  
1055 heatmap. We found that relatively few states were the recipients of the majority of high  
1056 probability transitions, and many states received none. To more clearly visualize the structure of  
1057 transitions, we grouped together all gait states receiving no more than one unique high  
1058 probability transition based on the idea that state transitions into this group show little bias in  
1059 terms of source state, and within the group, transitions between states exhibit low probability,  
1060 time unbiased, equilibrium-like fluctuations.

1061

## 1062 Biophysical model and simulations

1063 For our simple biophysical model, we consider a 2D system in which a *Euplotes* cell is  
1064 walking across a surface in a low Reynolds number environment<sup>43</sup>. The cell has 14 cirri, which

1065 exist in one of two states: actively moving or not actively moving, following our quantitative gait  
1066 characterization. Cell position and orientation is defined in terms of equilibrium position of the  
1067 cirri. Cirri can generate a motive force to drive cell motility when moving and resist  
1068 displacement when not moving and in contact with the surface. For our model, we remain  
1069 agnostic to the details by which cirri produce generate force noting only that in our experiments,  
1070 no cell displacement was observed when cirri were not moving and in contact with the coverslip.  
1071 We therefore let cirri generate a constant force in the direction dictated by cell orientation when  
1072 moving. We conceptualize the resistance to displacement of unmoving cirri as stemming from  
1073 the adhesive interaction between the cirrus and the substrate on which the cell is walking and the  
1074 energy required to bend or deflect a cirrus. Consistent with experimental observations, we do not  
1075 allow for translation of a cirrus-substrate contact point while a cirrus is not actively moving.

1076 For a particle moving through a fluid at low Reynolds number, such as our cell, velocity  
1077  $\vec{v}$  will be given by

$$1078 \quad \vec{v} = \frac{\sum \vec{F}}{\gamma},$$

1079 where  $\sum \vec{F}$  is the sum of the external forces acting on the particle, and  $\gamma$  is constant related to the  
1080 geometry of the particle and the viscosity of the fluid<sup>120,121</sup> accounting for drag. In our model,  
1081 cirri are responsible for the forces involved in motility, so  $\sum \vec{F} = \vec{F}_a + \vec{F}_i$  with the motive force  
1082  $\vec{F}_a = nF_a\vec{o}$  where  $n$  is the number of active cirri,  $F_a$  is the magnitude of the constant force  
1083 generated by active cirri, and  $\vec{o}$  is the unit vector in the direction of cell orientation, and the  
1084 resistive force  $\vec{F}_i = \sum_i k\vec{d}_i$  is a sum over the inactive cirri where  $k$  is a constant controlling the  
1085 resistance of a cirrus to deformation and  $\vec{d}_i$  is the displacement vector of inactive cirrus  $i$ . We  
1086 note that the forces driving cell motility in *Euplotes* stem from complex mechanical interactions,  
1087 but for our model, we have chosen simple, first order expression to capture very basic features.

1088 Similar to the expression for velocity above, angular velocity of a walking cell in our  
1089 model is given by

$$1090 \vec{\omega} = \frac{\sum \vec{F}_i \times \vec{r}_i}{\beta},$$

1091 where  $\beta$  is a constant related to the geometry of the cell and viscosity of the fluid,  $\vec{F}_i$  is the force  
1092 due to cirrus  $i$  ( $F_a \vec{d}$  for active cirri and  $k\vec{d}$  for inactive cirri), and  $\vec{r}_i$  is the vector pointing from  
1093 the center of the cell to cirrus  $i$ .

1094 In addition to the relative positions of the cirri and patterns of cirral activity, the four  
1095 parameters  $\gamma, \beta, F_a$  and  $k$  govern cell motility in our model. From these four parameters, we  
1096 obtain three related dimensionless parameters:  $\alpha = \beta/\gamma l$  where  $l$  is the maximum distance  
1097 between cirri, which can be thought of as characterizing the unsteadiness of the cell the intrinsic  
1098 susceptibility of the cell to turning due to cell geometry;  $M = F_a/k l$ , which can be thought of as  
1099 characterizing degree to which cirral activity will tend to induce cell movement in opposition to  
1100 inactive cirri; and  $\mathcal{F} = F_a t/\gamma l$  where  $t$  is the duration of a timestep in simulations, which can be  
1101 thought of as the strength of the cirral motive force relative to the viscous drag experienced by  
1102 the cell due to its fluid environment.

1103 For all simulations, relative equilibrium cirral positions calculated from the average cirral  
1104 positions in a video frame with no cirral activity over the 13 cells used for gait analysis (Figure  
1105 2) were used. In each simulation timestep, defined by the timestep used for recording videos for  
1106 gait analysis, velocity and angular velocity are calculated based on the positions and activity of  
1107 cirri, and the positions of all cirri are updated accordingly before proceeding. To calibrate the  
1108 parameters of the model, we used the cirral patterns recorded from the cells used for gait  
1109 analysis. We swept parameter space and found that simulations qualitatively and semi-  
1110 quantitatively recapitulated experimentally measured cell motility with  $\alpha = 0.001$ ,  $M = 0.26$ ,

1111 and  $\mathcal{F} = 0.008$  (Figure 3K, Figure S1). These parameter values were subsequently used for all  
1112 simulations.

1113 For simulations with shuffled gait state transitions, we used MATLAB's shuffle  
1114 command on the cirral dynamics of actual cells to obtain sequences of gait state transitions of the  
1115 same length as those that were experimentally obtained except in a random order. To obtain  
1116 random patterns of cirral activity similar to those measured experimentally, we generated cirral  
1117 activity according to a process defined by two probabilities:  $p_a$ , the probability of transitioning  
1118 from inactive to active at each timestep and  $p_i$ , the probability of transitioning from inactive to  
1119 active at each timestep. We initialized sequences with no cirral activity and then updated cirral  
1120 activity according to these probabilities for each timestep in the sequence. We found that setting  
1121  $p_a=0.3$  and  $p_i=0.1$  yielded the same average cirral activity as that recorded experimentally,  $0.23 \pm$   
1122  $0.42$  per frame and  $0.24 \pm 0.43$  per frame respectively where the values are mean  $\pm$  standard  
1123 deviation. All simulations were performed in MATLAB.

1124

### 1125 Confocal microscopy

1126 Cells were prepared for imaging and placed into a FluoroDish as described in the Live  
1127 Cell Brightfield Microscopy section. Cells were then labeled with SiR-tubulin (Spirochrome  
1128 provided by Cytoskeleton, Inc, CY-SC002) at 1  $\mu\text{M}$  concentration. Cells were imaged using a  
1129 Zeiss LSM 880 AxioExaminer and a 40x, 1.2 NA C-Apochromat water immersion objective  
1130 (Zeiss) and excitation provided by a 633 nm laser (Zeiss). Only one full confocal z-stack of a  
1131 complete cell was obtained during imaging to avoid effects of photodamage.

1132

### 1133 Fiber reconstruction and analysis

1134 The image stack resulting from confocal imaging was first aligned in FIJI using the  
1135 StackReg plugin<sup>110</sup>. Next, fibers were manually segmented in each of the aligned z-stack images  
1136 using the TrakEM2 plugin in FIJI<sup>122,123</sup>. Thick and thin fibers (Figure 4A) were morphologically  
1137 distinguished, with thick fibers having a diameter of no less than 5  $\mu\text{m}$  at the thinnest point.  
1138 Fibers were traced from their distal termini to their convergences at the base of the cirri with  
1139 which they were associated. Following segmentation, 3D surfaces were reconstructed in  
1140 TrakEM2. Inter-fiber contacts were then found by inspection of 3D reconstructions and verified  
1141 by examining individual z-stack frames to confirm intersections between fibers.

1142  
1143

#### 1144 Drug treatment experiments and analysis

1145 For all cytoskeleton inhibitor treatment experiments, 1 mL of cells in culture were placed  
1146 in wells of 12-well plates (Thermo-Scientific, 12-565-321). Nocodazole (Sigma-Aldrich,  
1147 M1404) as a stock solution of 6.64 mM in DMSO diluted further in distilled water, was added to  
1148 achieve appropriate concentrations, with no more than 1  $\mu\text{L}$  of additional volume added, and 1  
1149  $\mu\text{L}$  of distilled water with equivalent DMSO concentration to nocodazole treatments added to  
1150 controls. Cells were incubated for 1 hr before initiating experiments. No cell death was observed  
1151 at any concentration of nocodazole in the 6 hours following nocodazole treatment. Paclitaxel  
1152 (Sigma-Aldrich, T7191) as a stock solution of 2.23 mM in DMSO diluted further to 20  $\mu\text{M}$  in  
1153 distilled water, was added to achieve a final concentration of 20 nM to cells in solution.  
1154 Latrunculin B (Thomas Scientific, C834E37) as a stock solution of 1.1 mM in ethanol was  
1155 further diluted in distilled water and added to achieve a final concentration of 10  $\mu\text{M}$  with cells  
1156 in solution. Cytochalasin B (Fisher Scientific 1493-96-2) as a stock solution of 2.1 mM in  
1157 ethanol was further diluted in distilled water was added to achieve a final concentration of 50  
1158  $\mu\text{M}$  with cells in solution. Jasplakinolide (Fisher Scientific 42-012-750UG) as a stock solution of

1159 1 mM in DMSO was further diluted in distilled water to achieve a final concentration of 10  $\mu$ M  
1160 with cells in solution. No cell death was observed in the 6 hours following treatment with any of  
1161 the actin inhibitors. For the control condition for actin inhibitor experiments, both DMSO and  
1162 ethanol was added to match the concentrations added in the cytochalasin B and jasplakinolide  
1163 conditions.

#### 1164 *Washout experiments*

1165 For nocodazole washout experiments, motility assays (described below) were also  
1166 performed after placement of cells into well plates and before nocodazole treatment. Following  
1167 0.2  $\mu$ M nocodazole treatment and another motility analysis, cells were picked in 5  $\mu$ L of media  
1168 and placed into wells of 6 well plates (Corning, CLS3736) each containing 2mL of fresh media.  
1169 No more than 20  $\mu$ L of nocodazole treatment media was added to any well so that the resultant  
1170 nocodazole concentration in the washed condition was no more than 2 nM. Cells were allowed to  
1171 recover in this condition for 4 hr, and then a final motility assay was performed.

#### 1172 *Motility analysis*

1173 For motility analysis, cells were picked from well-plates and placed onto well-slides  
1174 created by using a paper hole punch tool to punch a hole in 0.25 mm thick silicone spacer  
1175 material (CultureWell, 664475), and adhering the spacer material to a glass slide (Corning, 2947-  
1176 75X25). A total volume of 20  $\mu$ L including up to 4 cells was added to well slides. A glass  
1177 coverslip (FisherScientific, 12-545-D) was placed atop the well slide, sealing the well and  
1178 creating an imaging chamber. After creating the imaging chamber, cells were allowed to  
1179 acclimate to their new environment for 10 min. Cells were then imaged on a Zeiss Axio  
1180 Zoom.V16 microscope under darkfield illumination with a Canon EOS T5i DSLR camera  
1181 recording at 30 fps for 2 min. Videos were then processed using FIJI <sup>110</sup>. First, images were  
1182 cropped to remove extraneous parts of the field of view that did not contain the imaging



1183 chamber, and then background subtraction was performed by creating an image composed of  
1184 mean pixel intensity values over all frames of the video and subtracting this mean image from all  
1185 frames of the video. A mean filter with a four-pixel radius was then applied to each frame of the  
1186 video for the purpose of smoothing. After processing, tracking was performed using the  
1187 TrackMate FIJI plugin <sup>108</sup>. For detection of objects (cells), a Laplacian of Gaussian filter was  
1188 applied with an estimated blob diameter of 25 pixels and threshold of 0.1. A quality threshold  
1189 was set manually when necessary to filter out any detected objects that were not cells. The  
1190 Linear Assignment Tracker with a linking max distance of 15 pixels, gap-closing max distance  
1191 of 150 pixels, and a gap-closing max frame gap of 200 frames was then used to generate linked  
1192 tracks (trajectories) of detected cells. Trajectories were analyzed in MATLAB. Scaled path  
1193 length for each tracked cell was calculated by summing the length of all segments of the track  
1194 and dividing by the maximum distance the cell traveled from its starting point.

#### 1195 *Fiber length analysis*

1196 Just prior to confocal imaging, cells were washed by picking up to five cells in 10  $\mu$ L  
1197 volume each and placing into 1 mL fresh media in a 12-well plate (Thermo-Scientific, 12-565-  
1198 321). Cells were then prepared for imaging as described in the Confocal Imaging section of  
1199 Method Details. Confocal z-stacks were then loaded into FIJI and aligned using the StackReg  
1200 plugin <sup>110</sup>. Cell lengths were determined by finding the maximal distance between two points on  
1201 the front and rear ends of the cell. Because of variability in the detectable fibers in nocodazole  
1202 treated cells, only fibers associated with the rear cirri (j-n), which were visible in all cells, were  
1203 used for analysis. All of these rear fibers were measured, and the reported scaled fiber length was  
1204 obtained by dividing the length of the longest fiber by the corresponding cell length. In all cases,  
1205 the fiber associated with cirrus m was the longest fiber.

#### 1206 *Analysis of cirral dynamics in nocodazole and paclitaxel treated cells*

1207 Cells were prepared for imaging and imaged as described in the Live Cell Brightfield  
1208 Microscopy section of the Method Details with the exception that a Canon EOS T5i DSLR  
1209 mounted on a Zeiss Axio Zoom.V16 microscope was used to record movements. Additionally,  
1210 video was recorded at 0.066 seconds per frame to avoid blurring and then videos were  
1211 downsampled to 0.033 seconds per frame for analysis. Cirral dynamics were quantified as  
1212 described in the Quantification of Walking Dynamics section of the Method Details.

1213 To assign cirral configurations of nocodazole treated cells to previously identified gait  
1214 states, we first matched any cirral configurations with known gait state identity. Next, due to  
1215 proximity of new cirral configurations not observed in untreated cells (Figure S1), we were able  
1216 to map the new cirral configurations onto the clusters defining the gait states by determining the  
1217 nearest cluster to the new cirral configuration. Distance between new cirral configurations and  
1218 clusters were determined by finding the shortest distances to points defining convex hulls of each  
1219 cluster. The shortest of all these distances then indicated the nearest cluster and corresponding  
1220 gait state to which the new cirral configuration was assigned. We noted an obvious dense cluster  
1221 of points corresponding to activation of nearly all cirri, and we identified a new cluster and  
1222 corresponding gait state by applying the DBSCAN algorithm as described in the Clustering  
1223 section of the Method Details. Evaluation of transition dynamics was performed as described in  
1224 the State Transition Analysis section of the Method Details. This analysis was all performed in  
1225 MATLAB.

1226

### 1227 $\epsilon$ -machine construction

1228 Our representation of the Euplotes at timestep  $t$  takes the form of a length 14  
1229 binary string  $x^t = [x_1^t, x_2^t, \dots, x_{14}^t]$  where  $x_i^t \in \{0, 1\}$ . For reducing dimensions,

1230 we found that bigrams of the 14-dimensional strings, yielded more consistent, interpretable  
1231 results than unigrams, so  $x'^t = [x_1^t, x_2^t, \dots, x_{14}^t, x_1^{t+1}, x_2^{t+1}, \dots, x_{14}^{t+1}] \in \{0, 1\}^{28}$ .  
1232 In order to learn latent states, we used Variational AutoEncoders (VAEs) <sup>124</sup> to reduce each  
1233 fourteen dimensional timestep to three dimensions. VAEs in particular are used for their ability  
1234 to learn an interpolatable latent space where high-dimensional training data points are mapped to  
1235 points in low-dimensional space that mimic a normal distribution centered around the origin.  
1236 This processes yields a smooth latent space with dimensions that represent core aspects of the  
1237 data. We used a very minimal VAE with an Adam optimizer <sup>125</sup>, consisting of one dense layer  
1238 for the generating encoder means and one dense layer for generating encoder variance. This  
1239 creates a 3-dimensional normal-like distribution, which we sample from and decode with a one  
1240 layer decoder.

1241  $\text{VariationalEncoder}(x'^t) \rightarrow z^t \in \mathbb{R}^3$

1242 After reducing the dimensionality of our data, we perform spectral clustering <sup>126</sup> using  
1243 scikit-learn <sup>127</sup> with 100 k-means runs and 4 clusters, where the cluster count was decided by  
1244 inspection of the resulting classes.

1245  $\text{SpectralClustering}(z^t) \rightarrow c^t \in \{1, 2, 3, 4\}$

1246 Applying this procedure to the data from the cells used for gait analysis (the same as used for  
1247 Figure 2) with bigram training parameters lr=0.0011, weight\_decay=0.000727, k=3,  
1248 hidden\_dim=5, beta1=0.5, and beta2=0.900, we found the following four clusters corresponding  
1249 to particular patterns of cirral activity: 1) Front cirral activity 2) High overall cirral activity 3)  
1250 Rear cirral activity and 4) Little cirral activity (Figure S5). When we applied this procedure to  
1251 the data from cells treated with 0.2  $\mu\text{M}$  nocodazole (the same data used for Figure 5) with  
1252 bigram training parameters lr=0.0026, weight\_decay=0.000106, k=3, hidden\_dim=3, beta1=0.5,  
1253 and beta2=0.999, we obtained only three distinct clusters with similar cirral activity patterns to

1254 those of untreated cells except that the rear cirral activity cluster (3 above) disappeared (Figure  
1255 S5). These clusters represent an independent, alternative coarse-graining of patterns of cirral  
1256 activity into gait states to that presented in Figure 2. Although independent, this procedure  
1257 identified the same underlying structure in the data. In particular, the alternative gait states here  
1258 involve similar patterns of cirral activity to those defining the NMF components depicted in  
1259 Figure 2H. Whereas the spatially distinct groups of cirri sharing the most mutual information  
1260 define the space of gait states under the NMF-based approach, under this alternative, activity or  
1261 complete lack thereof in those same groups of cirri defines the gait states. Furthermore, the loss  
1262 of cluster 4 under nocodazole treatment is consistent with the loss of gait states as depicted in  
1263 Figure 5I.

1264 To construct  $\epsilon$ -machines<sup>79</sup>, characterized by a set of causal-states and transitions between  
1265 them, we feed a stream of behavioral symbols  $c_0, c_1, \dots, c_T$  into a Causal-State Splitting  
1266 Reconstruction (CSSR)<sup>89,128</sup> algorithm. Due to the nature of the CSSR algorithm, we can only  
1267 construct  $\epsilon$ -machines from unbroken data streams, so we constructed  $\epsilon$ -machines for each cell  
1268 from a given dataset. Performing this process over gait state data streams derived from cirral  
1269 activity recordings as described above for each cell from the untreated and nocodazole datasets  
1270 yielded a set of  $\epsilon$  machines. Representative examples of  $\epsilon$ -machines obtained from each dataset  
1271 are depicted in Figure S5.

1272

### 1273 Microsurgery experiments

1274 All microsurgeries were performed by hand under observation with a Zeiss Axio  
1275 Zoom.V16 using quartz microneedles pulled from quartz rods (Sutter Instrument, QR100-10)  
1276 using a Sutter Instrument P-2000 Laser-based micropipette puller. Individual cells were picked  
1277 and placed in a 5  $\mu$ L droplet at the center of an imaging chamber as described in the Motility

1278 Analysis section of the Method Details. For bisections, microneedles were quickly and firmly  
1279 pressed onto cells just anterior to cirrus h, cleanly severing the cell including the fibers  
1280 associated with cirri j-n and sealing the cell membrane. Cells were allowed to recover for at least  
1281 5 minutes until some motility resumed, and then 15  $\mu$ L of fresh culture media was added to the  
1282 imaging chamber, which was subsequently sealed with a glass coverslip (FisherScientific, 12-  
1283 545-D) to minimize evaporation. After 24 hr, once cell fragments resumed walking motility, gait  
1284 analysis was performed as described in the quantification of walking dynamics section of the  
1285 Method Details, except that cell fragments only had 7 cirri (j-n) instead of the full 14.  
1286 Experiments with wounded cells were conducted in the same fashion as described for bisections  
1287 except that instead of cutting cells in half, wounding was performed by stabbing with a  
1288 microneedle a portion of the cell that does not have any fibers and was confirmed visually by the  
1289 loss of some amount of cytoplasm.

1290

### 1291 **Quantifications and statistical analysis**

1292 Statistical details of the experiments can be found in the figure legends, the main text, or the  
1293 Method Details section. Statistical details include exact value of n, what n represents (generally  
1294 the number of cells measured), definitions of center, and dispersion and precision measures.  
1295 Statistical tests and fits were performed as described in the Method Details section using  
1296 MATLAB release 2019b or 2020b (Mathworks, Natick).

1297

### 1298 **Supplemental Video Captions**

1299 **Video S1. A walking cell.** A representative example of a single *Euplotes eurytomus* cell  
1300 walking across a coverslip using motile cirri illustrates the walking gait. Note that the movement  
1301 of cirri, or lack thereof is clearly visible in each frame of the movie. This cell was imaged using a

1302 Zeiss Axio Zoom.V16 microscope under brightfield illumination. The video is slowed down by a  
1303 factor of 4 from real time to show that the movements of cirri are clearly visible.

1304

1305 **Video S2. Walking motility including escape responses.** A representative example of a single  
1306 *Euplotes eurystomus* cell walking across a coverslip using motile cirri including escape  
1307 responses, which were excluded from gait analysis. Escape responses occur at  $t=$  18s, 20s, and  
1308 25s. This cell was imaged under brightfield illumination using a Zeiss Z.1 Observer with a 20x,  
1309 0.8 NA Plan-Apochromat (Zeiss) objective. The video is slowed down by a factor of 4 from real  
1310 time so that the movements are clearly perceivable.

1311

1312 **Video S3. Cell tracking for motility analysis.** A representative example of the trajectories of  
1313 cells imaged at low magnification under darkfield illumination using a Zeiss Axio Zoom.V16  
1314 microscope. Cells appear as bright objects with magenta circles around them. Different colored  
1315 lines correspond to the tracks of different cells tracked using the FIJI plugin TrackMate.

1316

1317 **Video S4. Motility of nocodazole treated cells.** A representative example of the trajectories of  
1318 cells treated with 200 nM nocodazole imaged at low magnification under darkfield illumination.  
1319 Cells appear as bright objects with magenta circles around them. Different colored lines  
1320 correspond to the tracks of different cells tracked using the FIJI plugin TrackMate. Note the  
1321 confined movements of cells due to a decrease in long, linear runs. Compare to Movie 3 for the  
1322 control condition.

1323

1324 **Video S5. Motility of paclitaxel cells.** A representative example of the trajectories of cells  
1325 treated with 20 nM paclitaxel imaged at low magnification under darkfield illumination. Cells

1326 appear as bright objects with magenta circles around them. Different colored lines correspond to  
1327 the tracks of different cells tracked using the FIJI plugin TrackMate. Note the increase in long,  
1328 linear runs and decrease in abrupt changes in direction and tight turns. Compare to Movie 3 for  
1329 the control condition.

1330

1331 **Video S6. A walking, bisected cell.** A representative example of a bisected cell analyzed in  
1332 microsurgery experiments displaying the characteristic backwards, spiral walking motility  
1333 defect. This cell fragment was imaged using a Zeiss Axio Zoom.V16 microscope under  
1334 brightfield illumination. The video is slowed down by a factor of 4 from real time to clearly  
1335 show the movements of cirri.

1336

1337 **Video S7. A walking, wounded cell.** A representative example of a wounded cell analyzed in  
1338 microsurgery experiments. This cell was imaged using a Zeiss Axio Zoom.V16 microscope  
1339 under brightfield illumination. The video is slowed down by a factor of 4 from real time to  
1340 clearly show the movements of cirri.

1341

## 1342 **Acknowledgements**

1343 We would like to thank Nicole King for the use of the confocal microscope and Adair Oesterle  
1344 for assistance with microsurgery. We would like to thank the students and faculty of the 2016  
1345 Marine Biological Laboratory Physiology Course and current and former members of the  
1346 Marshall Lab and King Lab for comments, critiques, and encouragement during the development  
1347 of this project. We would also like to thank David Booth, Greyson Lewis, Dennis Bray, and  
1348 members of the Fourmentin-Guilbert Scientific Foundation for comments on the manuscript.  
1349 This work was funded by the I2CELL Seed Award of the Fourmentin-Guilbert Scientific

1350 Foundation (WFM, JBP). Additional funding was provided by NIH grant R35 GM130327  
1351 (WFM), NSF grant MCB- 2012647 (WFM), and a Merck Fellowship of the Jane Coffin Childs  
1352 Memorial Fund for Medical Research (BTL).

1353

### 1354 **Author Contributions**

1355 BTL, JDP, and WFM conceived of the study. BTL, JG, and WFM developed methodology. BTL  
1356 performed the experiments, and all authors analyzed and interpreted data. BTL and WFM  
1357 originally drafted the manuscript, and all authors reviewed and edited the work.

1358

### 1359 **Declaration of Interests**

1360 The authors declare no competing interests.

1361

### 1362 **References**

- 1363 1. Jennings, H.S. (1906). Behavior of the lower organisms. (Columbia University Press).
- 1364 2. Reid, C.R., MacDonald, H., Mann, R.P., Marshall, J.A.R., Latty, T., and Garnier, S.  
1365 (2016). Decision-making without a brain: how an amoeboid organism solves the two-  
1366 armed bandit. *J. R. Soc. Interface* *13*, 20160030.
- 1367 3. Coyle, S.M., Flaum, E.M., Li, H., Krishnamurthy, D., and Prakash, M. (2019). Coupled  
1368 Active Systems Encode an Emergent Hunting Behavior in the Unicellular Predator  
1369 *Lacrymaria olor*. *Curr. Biol.* *29*, 3838-3850.e3.
- 1370 4. Battle, C., Broedersz, C.P., Fakhri, N., Geyer, V.F., Howard, J., Schmidt, C.F., and  
1371 MacKintosh, F.C. (2016). Broken detailed balance at mesoscopic scales in active  
1372 biological systems. *Science* *352*, 604–7.



- 1373 5. Wan, K.Y., and Goldstein, R.E. (2018). Time Irreversibility and Criticality in the Motility  
1374 of a Flagellate Microorganism. *Phys. Rev. Lett.* *121*, 58103.
- 1375 6. Woznica, A., Cantley, A.M., Beemelmans, C., Freinkman, E., Clardy, J., and King, N.  
1376 (2016). Bacterial lipids activate, synergize, and inhibit a developmental switch in  
1377 choanoflagellates. *Proc. Natl. Acad. Sci. U. S. A.* *113*, 7894–7899.
- 1378 7. Wan, K.Y. (2018). Coordination of eukaryotic cilia and flagella. *Essays Biochem.* *62*,  
1379 829–838.
- 1380 8. Nomura, M., and Ishida, K.I. (2016). Fine-structural Observations on Siliceous Scale  
1381 Production and Shell Assembly in the Testate Amoeba *Paulinella chromatophora*. *Protist*  
1382 *167*, 303–318.
- 1383 9. Bennett, R.R., and Golestanian, R. (2015). A steering mechanism for phototaxis in  
1384 *Chlamydomonas*. *J. R. Soc. Interface* *12*, 20141164–20141164.
- 1385 10. Machemer, H. (2001). The swimming cell and its world: Structures and mechanisms of  
1386 orientation in protists. *Eur. J. Protistol.* *37*, 3–14.
- 1387 11. Almagor, M., Ron, A., and Bar-Tana, J. (1981). Chemotaxis in *Tetrahymena thermophila*.  
1388 *Cell Motil.* *1*, 261–268.
- 1389 12. Berg, H.C., and Brown, D.A. (1972). Chemotaxis in *Escherichia coli* analysed by three-  
1390 dimensional tracking. *Nature* *239*, 500–504.
- 1391 13. Nakagaki, T., Yamada, H., and Tóth, Á. (2000). Maze-solving by an amoeboid organism.  
1392 *Nature* *407*, 470–470.
- 1393 14. Tweedy, L., Thomason, P.A., Paschke, P.I., Martin, K., Machesky, L.M., Zagnoni, M.,  
1394 and Insall, R.H. (2020). Seeing around corners: Cells solve mazes and respond at a  
1395 distance using attractant breakdown. *Science* (80-. ). *369*.
- 1396 15. Applewhite, P.B. (1979). Learning in Protozoa. In *Biochemistry and Physiology of*

- 1397 Protozoa (Elsevier), pp. 341–355.
- 1398 16. Dexter, J.P., Prabakaran, S., and Gunawardena, J. (2019). A Complex Hierarchy of  
1399 Avoidance Behaviors in a Single-Cell Eukaryote. *Curr. Biol.* 29, 4323-4329.e2.
- 1400 17. Jennings, H.S. (1902). Studies on reactions to stimuli in unicellular organisms. IX—On  
1401 the behavior of fixed infusoria (*Stentor* and *Vorticella*), with special reference to the  
1402 modifiability of protozoan reactions. *Am. J. Physiol. Content* 8, 23–60.
- 1403 18. Tang, S.K.Y., and Marshall, W.F. (2018). Cell learning. *Curr. Biol.* 28, R1180–R1184.
- 1404 19. Lyon, P. (2015). The cognitive cell: Bacterial behavior reconsidered. *Front. Microbiol.* 6.
- 1405 20. Marshall, W.F. (2019). Cellular Cognition: Sequential Logic in a Giant Protist. *Curr. Biol.*  
1406 29, R1303–R1305.
- 1407 21. Greenfield, D., McEvoy, A.L., Shroff, H., Crooks, G.E., Wingreen, N.S., Betzig, E., and  
1408 Liphardt, J. (2009). Self-Organization of the *Escherichia coli* Chemotaxis Network  
1409 Imaged with Super-Resolution Light Microscopy. *PLoS Biol.* 7, e1000137.
- 1410 22. Wan, K.Y., and Goldstein, R.E. (2016). Coordinated beating of algal flagella is mediated  
1411 by basal coupling. *Proc. Natl. Acad. Sci. U. S. A.* 113, E2784-93.
- 1412 23. Höfer, T., Sherratt, J.A., and Maini, P.K. (1995). *Dictyostelium discoideum* : cellular self-  
1413 organization in an excitable biological medium. *Proc. R. Soc. London. Ser. B Biol. Sci.*  
1414 259, 249–257.
- 1415 24. Kantsler, V., Dunkel, J., Polin, M., and Goldstein, R.E. (2013). Ciliary contact interactions  
1416 dominate surface scattering of swimming eukaryotes. *Proc. Natl. Acad. Sci. U. S. A.* 110,  
1417 1187–1192.
- 1418 25. Bray, D. (2009). *Wetware* (Yale University Press).
- 1419 26. Pfeifer, R., Lungarella, M., and Iida, F. (2007). Self-organization, embodiment, and  
1420 biologically inspired robotics. *Science* (80-. ). 318, 1088–1093.

- 1421 27. Regev, A., and Shapiro, E. (2002). Cellular abstractions: Cells as computation. *Nature*  
1422 *419*, 343–343.
- 1423 28. Mitchell, M. (2012). Biological Computation. *Comput. J.* *55*, 852–855.
- 1424 29. Navlakha, S., and Bar-Joseph, Z. (2011). Algorithms in nature: the convergence of  
1425 systems biology and computational thinking. *Mol. Syst. Biol.* *7*, 546.
- 1426 30. Savin, T., Kurpios, N.A., Shyer, A.E., Florescu, P., Liang, H., Mahadevan, L., and Tabin,  
1427 C.J. (2011). On the growth and form of the gut. *Nature* *476*, 57–62.
- 1428 31. Mehta, P., and Schwab, D.J. (2012). Energetic costs of cellular computation. *Proc. Natl.*  
1429 *Acad. Sci. U. S. A.* *109*, 17978–17982.
- 1430 32. Berg, H.C., and Purcell, E.M. (1977). Physics of chemoreception. *Biophys. J.* *20*, 193–  
1431 219.
- 1432 33. Bialek, W., and Setayeshgar, S. (2005). Physical limits to biochemical signaling. *Proc.*  
1433 *Natl. Acad. Sci. U. S. A.* *102*, 10040–5.
- 1434 34. Andrews, L.B., Nielsen, A.A.K., and Voigt, C.A. (2018). Cellular checkpoint control  
1435 using programmable sequential logic. *Science (80-. )*. *361*.
- 1436 35. Gilbert, J.J. (1994). Jumping behavior in the oligotrich ciliates *Strobilidium velox* and  
1437 *Halteria grandinella*, and its significance as a defense against rotifer predators. *Microb.*  
1438 *Ecol.* *27*, 189–200.
- 1439 36. Lueken, W., Ricci, N., and Krüppel, T. (1996). Rhythmic spontaneous depolarizations  
1440 determine a slow-and-fast rhythm in walking of the marine hypotrich *Euplotes vannus*.  
1441 *Eur. J. Protistol.* *32*, 47–54.
- 1442 37. Erra, F., Iervasi, A., Ricci, N., and Banchetti, R. (2001). Movement of the cirri during the  
1443 creeping of *Euplotes crassus* (Ciliata, Hypotrichida). *Can. J. Zool.* *79*, 1353–1362.
- 1444 38. Taylor, C. V. (1919). The neuromotor system of *Euplotes*. *Exp. Biol. Med.* *16*, 101–103.

- 1445 39. Syberg-Olsen, M.J., Irwin, N.A.T., Vannini, C., Erra, F., Di Giuseppe, G., Boscaro, V.,  
1446 and Keeling, P.J. (2016). Biogeography and character evolution of the ciliate genus  
1447 *Euplotes* (Spirotrichea, Euplotia), with description of *Euplotes curdsi* sp. nov. *PLoS One*  
1448 *11*.
- 1449 40. Ricci, N., Giannetti, R., and Miceli, C. (1988). The ethogram of *Euplotes crassus* (ciliata,  
1450 hypotrichida): I. The wild type. *Eur. J. Protistol.* *23*, 129–140.
- 1451 41. Li, Y., Shi, L., and Gu, F. (2010). Comparison of ciliature microtubule organelles in three  
1452 hypotrichous ciliate species\*. *Chinese J. Oceanol. Limnol.* *28*, 443–450.
- 1453 42. Fleury, A. (1991). Dynamics of the cytoskeleton during morphogenesis in the ciliate  
1454 *Euplotes* I. Basal bodies related microtubular system. *Eur. J. Protistol.* *27*, 99–114.
- 1455 43. Purcell, E.M. (1977). Life at low Reynolds number. *Am. J. Phys.* *45*, 3–11.
- 1456 44. Kimmel, J.C., Chang, A.Y., Brack, A.S., and Marshall, W.F. (2018). Inferring cell state by  
1457 quantitative motility analysis reveals a dynamic state system and broken detailed balance.  
1458 *PLoS Comput. Biol.* *14*, e1005927.
- 1459 45. Chang, A.Y., and Marshall, W.F. (2019). Dynamics of living cells in a cytomorphological  
1460 state space. *Proc. Natl. Acad. Sci. U. S. A.* *116*, 21556–21562.
- 1461 46. Boltzmann, L. (1872). Weirere Studien uber das warmegleich-gewich unter gasmolekulen.  
1462 *Sitzungsberichte der Akad. der Wissenschaften, Vienna, part II* *66*, 275–370.
- 1463 47. Alberts, B., Johnson, A., Lewis, J., Raff, M., Roberts, K., and Walter, P. (2002).  
1464 *Molecular biology of the cell* 4th ed. (Garland Science).
- 1465 48. Shalizi, C.R., and Crutchfield, J.P. (2001). Computational Mechanics: Pattern and  
1466 Prediction, Structure and Simplicity. *J. Stat. Phys.* *104*, 817–879.
- 1467 49. Crutchfield, J.P. (1994). The calculi of emergence: computation, dynamics and induction.  
1468 *Phys. D Nonlinear Phenom.* *75*, 11–54.

- 1469 50. Hopcroft, J.E., Motwani, R., and Ullman, J.D. (2008). Introduction to Automata Theory,  
1470 Languages, and Computation 3rd ed. (Pearson Education).
- 1471 51. Ricci, N., Giannetti, R., and Miceli, C. (1988). The ethogram of *Euplotes crassus* (ciliata,  
1472 hypotrichida): I. The wild type. *Eur. J. Protistol.* 23, 129–140.
- 1473 52. Moore, T.Y., Cooper, K.L., Biewener, A.A., and Vasudevan, R. Unpredictability of  
1474 escape trajectory explains predator evasion ability and microhabitat preference of desert  
1475 rodents.
- 1476 53. Goldstein, R.E. (2015). Green Algae as Model Organisms for Biological Fluid Dynamics.  
1477 *Annu. Rev. Fluid Mech.* 47, 343–375.
- 1478 54. Simon, M., and Plattner, H. (2014). Unicellular Eukaryotes as Models in Cell and  
1479 Molecular Biology: Critical Appraisal of Their Past and Future Value. In *International  
1480 Review of Cell and Molecular Biology* (Elsevier Inc.), pp. 141–198.
- 1481 55. Durham, W.M., Climent, E., Barry, M., De Lillo, F., Boffetta, G., Cencini, M., and  
1482 Stocker, R. (2013). Turbulence drives microscale patches of motile phytoplankton. *Nat.  
1483 Commun.* 4.
- 1484 56. Mogilner, A., and Oster, G. (1996). Cell motility driven by actin polymerization. *Biophys.  
1485 J.* 71, 3030–3045.
- 1486 57. Collins, J.J., and Richmond, S.A. (1994). Biological cybemet Hard-wired central pattern  
1487 generators for quadrupedal locomotion.
- 1488 58. Collins, J.J., and Stewart, I.N. (1993). Coupled nonlinear oscillators and the symmetries of  
1489 animal gaits. *J. Nonlinear Sci.* 3, 349–392.
- 1490 59. Barnhart, E.L., Allen, G.M., Jülicher, F., and Theriot, J.A. (2010). Bipedal locomotion in  
1491 crawling cells. *Biophys. J.* 98, 933–942.
- 1492 60. Machemer, H., and Sugino, K. ELECTROPHYSIOLOGICAL CONTROL OF CILIARY

- 1493 BEATING: A BASIS OF MOTILE BEHAVIOUR IN CILIATED PROTOZOA. *Comp.*  
1494 *Biochem. Physiol* 94, 365.
- 1495 61. Mogami, Y., Pernberg, J., and Machemer, H. (1992). Ciliary beating in three dimensions:  
1496 Steps of a quantitative description. *J. Math. Biol.* 1992 303 30, 215–249.
- 1497 62. McNeill Alexander, R. (2003). *Principles of Animal Locomotion* (Princeton University  
1498 Press).
- 1499 63. Wan, K.Y., and Jékely, G. (2020). On the unity and diversity of cilia. *Philos. Trans. R.*  
1500 *Soc. Lond. B. Biol. Sci.* 375, 20190148.
- 1501 64. Ahamed, T., Costa, A.C., and Stephens, G.J. Capturing the Continuous Complexity of  
1502 Behavior in *C. elegans*.
- 1503 65. Stephens, G.J., Johnson-Kerner, B., Bialek, W., and Ryu, W.S. (2008). Dimensionality  
1504 and Dynamics in the Behavior of *C. elegans*. *PLoS Comput. Biol.* 4, e1000028.
- 1505 66. Berman, G.J., Choi, D.M., Bialek, W., and Shaevitz, J.W. (2014). Mapping the  
1506 stereotyped behaviour of freely moving fruit flies. *J. R. Soc. Interface* 11, 20140672.
- 1507 67. Stephens, G.J., Osborne, L.C., and Bialek, W. (2010). Searching for simplicity:  
1508 Approaches to the analysis of neurons and behavior. *Proc. Natl. Acad. Sci. U. S. A.* 108,  
1509 15565–15571.
- 1510 68. Devarajan, K. (2008). Nonnegative Matrix Factorization: An Analytical and Interpretive  
1511 Tool in Computational Biology. *PLoS Comput. Biol.* 4.
- 1512 69. Lee, D.D., and Seung, H.S. (1999). Learning the parts of objects by non-negative matrix  
1513 factorization. *Nat.* 1999 4016755 401, 788–791.
- 1514 70. Ester, M., Kriegel, H.-P., Sander, J., and Xu, X. (1996). A Density-Based Algorithm for  
1515 Discovering Clusters in Large Spatial Databases with Noise.
- 1516 71. Kauffman, L., and Rousseeuw, P.J. (1990). *Finding Groups in Data: and introduction to*

- 1517 cluster analysis (John Wiley & Sons, Inc.).
- 1518 72. Kirkegaard, J.B., Marron, A.O., and Goldstein, R.E. (2016). Motility of Colonial  
1519 Choanoflagellates and the Statistics of Aggregate Random Walkers. *Phys. Rev. Lett.* *116*,  
1520 038102.
- 1521 73. M Cartmill (1985). Climbing. In *Functional Vertebrate Morphology* (Harvard University  
1522 Press), pp. 73–88.
- 1523 74. Kolmogoroff, A. (1936). Zur Theorie der Markoffschen Ketten. *Math. Ann.* *112*, 155–  
1524 160.
- 1525 75. Gagniuc, P. (2017). *Markov Chains: From Theory to Implementation and*  
1526 *Experimentation* (Wiley).
- 1527 76. Markov, A.A. (1907). Extension of the Limit Theorems of Probability Theory to a Sum of  
1528 Variables Connected in a Chain. *Notes Imp. Acad. Sci. St. Petersburg. VIII Ser. Physio-*  
1529 *Mathematical Coll.* *22*.
- 1530 77. Howard, R.A. (1971). *Dynamic and Probabilistic Systems, Volume 1: Markov models*  
1531 (Dover Publications).
- 1532 78. Crutchfield, J.P., and Young, K. (1989). Computation at the Onset of Chaos. In  
1533 *Complexity, Entropy, and Physics of Information*, W. Zurek, ed. (Addison-Wesley).
- 1534 79. Crutchfield, J.P., and Young, K. (1989). Inferring statistical complexity. *Phys. Rev. Lett.*  
1535 *63*, 105–108.
- 1536 80. Moore, C. (1998). Dynamical recognizers: Real-time language recognition by analog  
1537 computers. *Theor. Comput. Sci.*
- 1538 81. Skinner, D.J., and Dunkel, J. (2021). Improved bounds on entropy production in living  
1539 systems. *Proc. Natl. Acad. Sci. U. S. A.* *118*.
- 1540 82. Martínez, I.A., Bisker, G., Horowitz, J.M., and Parrondo, J.M.R. Inferring broken detailed

- 1541 balance in the absence of observable currents.
- 1542 83. Esposito, M. (2012). Stochastic thermodynamics under coarse graining. *Phys. Rev. E -*  
1543 *Stat. Nonlinear, Soft Matter Phys.* *85*, 041125.
- 1544 84. Taylor, C.V. (1921). Demonstration of the function of the neuromotor apparatus in  
1545 *Euplotes* by the method of microdissection. *Naturwissenschaften* *9*, 910.
- 1546 85. Okajima, A., and Kinosita, H. (1966). Ciliary activity and coordination in *Euplotes*  
1547 *eurystomus*-I. Effect of microdissection of neuromotor fibres. *Comp. Biochem. Physiol.*  
1548 *19*, 115–131.
- 1549 86. Naitoh, Y., and Eckert, R. (1969). Ciliary Orientation: Controlled by Cell Membrane or by  
1550 Intracellular Fibrils? *Science* (80- ). *166*, 1633–1635.
- 1551 87. Okabe, A., and Miki, F. (1984). A Conditional Nearest-Neighbor Spatial-Association  
1552 Measure for the Analysis of Conditional Locational Interdependence. *Environ. Plan. A*  
1553 *Econ. Sp.* *16*, 163–171.
- 1554 88. Jennings, H.S., and Jamieson, C. (1902). Studies on reactions to stimuli in unicellular  
1555 organisms. X. The movements and reactions of pieces of ciliate infusoria. *Biol. Bull.* *3*,  
1556 225–234.
- 1557 89. Shalizi, C.R., Shalizi, K.L., and Crutchfield, J.P. (2002). An Algorithm for Pattern  
1558 Discovery in Time Series. *ArXiv*.
- 1559 90. Lynn, C.W., Cornblath, E.J., Papadopoulos, L., Bertolero, M.A., and Bassett, D.S. (2021).  
1560 Broken detailed balance and entropy production in the human brain. *Proc. Natl. Acad. Sci.*  
1561 *U. S. A.* *118*.
- 1562 91. Bar-Ziv, R., Tlusty, T., and Libchaber, A. (2002). Protein-DNA computation by stochastic  
1563 assembly cascade. *Proc. Natl. Acad. Sci. U. S. A.* *99*, 11589–11592.
- 1564 92. Berman, G.J., Bialek, W., and Shaevitz, J.W. (2016). Predictability and hierarchy in



- 1565 Drosophila behavior. *Proc. Natl. Acad. Sci. U. S. A.* *113*, 11943–11948.
- 1566 93. Guasto, J.S., Rusconi, R., and Stocker, R. (2012). Fluid Mechanics of Planktonic  
1567 Microorganisms. *Annu. Rev. Fluid Mech.* *44*, 373–400.
- 1568 94. Goldstein, R.E., Polin, M., and Tuval, I. (2009). Noise and Synchronization in Pairs of  
1569 Beating Eukaryotic Flagella. *Phys. Rev. Lett.* *103*, 168103.
- 1570 95. Párducz, B. (1967). Ciliary Movement and Coordination in Ciliates. *Int. Rev. Cytol.* *21*,  
1571 91–128.
- 1572 96. Funfak, A., Fisch, C., Abdel Motaal, H.T., Diener, J., Combettes, L., Baroud, C.N., and  
1573 Dupuis-Williams, P. (2015). Paramecium swimming and ciliary beating patterns: A study  
1574 on four RNA interference mutations. *Integr. Biol. (United Kingdom)* *7*, 90–100.
- 1575 97. Kirkegaard, J.B., Bouillant, A., Marron, A.O., Leptos, K.C., and Goldstein, R.E. (2016).  
1576 Aerotaxis in the closest relatives of animals. *Elife* *5*, e18109.
- 1577 98. Miño, G.L., Koehl, M.A.R., King, N., and Stocker, R. (2017). Finding patches in a  
1578 heterogeneous aquatic environment: pH-taxis by the dispersal stage of choanoflagellates.  
1579 *Limnol. Oceanogr. Lett.* *2*, 37–46.
- 1580 99. Polin, M., Tuval, I., Drescher, K., Gollub, J.P., and Goldstein, R.E. (2009).  
1581 *Chlamydomonas* Swims with Two “Gears” in a Eukaryotic Version of Run-and-Tumble  
1582 Locomotion. *Science* (80-. ). *325*, 487–490.
- 1583 100. Li, Y., Kučera, O., Cuvelier, D., Rutkowski, D.M., Deygas, M., Rai, D., Pavlovič, T.,  
1584 Vicente, F.N., Piel, M., Giannone, G., et al. (2022). Compressive forces stabilise  
1585 microtubules in living cells. *bioRxiv*, 2022.02.07.479347.
- 1586 101. Maniotis, A.J., Chen, C.S., and Ingber, D.E. (1997). Demonstration of mechanical  
1587 connections between integrins, cytoskeletal filaments, and nucleoplasm that stabilize  
1588 nuclear structure. *Proc. Natl. Acad. Sci. U. S. A.* *94*, 849–854.

- 1589 102. Craddock, T.J.A., and Tuszynski, J.A. (2010). A critical assessment of the information  
1590 processing capabilities of neuronal microtubules using coherent excitations. *J. Biol. Phys.*  
1591 *36*, 53–70.
- 1592 103. Stock, C., Krüppel, T., Key, G., and Lueken, W. (1999). Sexual behaviour in *Euplotes*  
1593 *raikovi* is accompanied by pheromone-induced modifications of ionic currents. *J. Exp.*  
1594 *Biol.* *202*.
- 1595 104. Tuffrau, M., Fryd-Versavel, G., Tuffrau, H., and Générmont, J. (2000). Description of  
1596 *Euplotes versatilis* n. sp., a marine tropical ciliate exhibiting an unusually extensive  
1597 phenotypic plasticity. *Eur. J. Protistol.* *36*, 355–366.
- 1598 105. Keeling, P.J. (2019). Combining morphology, behaviour and genomics to understand the  
1599 evolution and ecology of microbial eukaryotes. *Philos. Trans. R. Soc. B Biol. Sci.* *374*.
- 1600 106. Kahl, A. (1935). *Urtiere oder Protozoa*. (Fischer).
- 1601 107. Yocom, H.B. (1917). The neuromotor apparatus of *Euplotes patella*.
- 1602 108. Tinevez, J.Y., Perry, N., Schindelin, J., Hoopes, G.M., Reynolds, G.D., Laplantine, E.,  
1603 Bednarek, S.Y., Shorte, S.L., and Eliceiri, K.W. (2017). TrackMate: An open and  
1604 extensible platform for single-particle tracking. *Methods* *115*, 80–90.
- 1605 109. King, N., Young, S.L., Abedin, M., Carr, M., and Leadbeater, B.S.C.C. (2009). Starting  
1606 and maintaining *Monosiga brevicollis* cultures. *Cold Spring Harb. Protoc.* *4*,  
1607 [pdb.prot5148](https://doi.org/10.1101/2009.08.01.148).
- 1608 110. Schindelin, J., Arganda-Carreras, I., Frise, E., Kaynig, V., Longair, M., Pietzsch, T.,  
1609 Preibisch, S., Rueden, C., Saalfeld, S., Schmid, B., et al. (2012). Fiji: an open-source  
1610 platform for biological-image analysis. *Nat. Methods* *9*, 676–682.
- 1611 111. Kanagal, B., and Sindhvani, V. (2010). Rank Selection in Low-rank Matrix  
1612 Approximations: A Study of Cross-Validation for NMFs. In *Advances in Neural*

- 1613 Information Processing Systems.
- 1614 112. Owen, A.B., and Perry, P.O. (2009). Bi-Cross-Validation of the SVD and the Nonnegative  
1615 Matrix Factorization. *Source Ann. Appl. Stat.* 3, 564–594.
- 1616 113. Wold, S. (1978). Cross-Validatory Estimation of the Number of Components in Factor  
1617 and Principal Components Models. *Technometrics* 20, 397–405.
- 1618 114. Ronan, T., Qi, Z., and Naegle, K.M. (2016). Avoiding common pitfalls when clustering  
1619 biological data. *Sci. Signal.* 9, re6–re6.
- 1620 115. Kawamoto, T., and Kabashima, Y. (2017). Cross-validation estimate of the number of  
1621 clusters in a network. *Sci. Rep.* 7, 1–17.
- 1622 116. Bak, P., Tang, C., and Wiesenfeld, K. (1987). Self-organized criticality: An explanation of  
1623 the  $1/f$  noise. *Phys. Rev. Lett.* 59, 381–384.
- 1624 117. Sánchez, R., Newman, D.E., and Carreras, B.A. (2002). Waiting-Time Statistics of Self-  
1625 Organized-Criticality Systems. *Phys. Rev. Lett.* 88, 4.
- 1626 118. Billingsley, P. (1961). *Statistical Methods in Markov Chains* (Institute of Mathematical  
1627 Statistics).
- 1628 119. Hiscott, R.N. (1981). *Chi-Square Tests for Markov Chain Analysis*.
- 1629 120. Happel, J., and Brenner, H. (1981). *Low Reynolds number hydrodynamics. 1.*
- 1630 121. Lighthill, J. (1976). Flagellar Hydrodynamics. *SIAM Rev.* 18, 161–230.
- 1631 122. Cardona, A., Saalfeld, S., Schindelin, J., Arganda-Carreras, I., Preibisch, S., Longair, M.,  
1632 Tomancak, P., Hartenstein, V., and Douglas, R.J. (2012). TrakEM2 Software for Neural  
1633 Circuit Reconstruction. *PLoS One* 7, e38011.
- 1634 123. Thévenaz, P., Ruttimann, U.E., and Unser, M. (1998). A pyramid approach to subpixel  
1635 registration based on intensity. *IEEE Trans. Image Process.* 7, 27–41.
- 1636 124. Kingma, D.P., and Welling, M. (2013). Auto-Encoding Variational Bayes.

- 1637 125. Kingma, D.P., and Ba, L.J. (2015). Adam: A Method for Stochastic Optimization.
- 1638 126. Bach, F.R., and Jordan, M.I. (2003). Learning Spectral Clustering. *Adv. Neural Inf.*
- 1639 *Process. Syst.* 16.
- 1640 127. Pedregosa, F., Michel, V., Grisel, O., Blondel, M., Prettenhofer, P., Weiss, R.,
- 1641 Vanderplas, J., Cournapeau, D., Pedregosa, F., Varoquaux, G., et al. (2011). Scikit-learn:
- 1642 Machine Learning in Python. *J. Mach. Learn. Res.* 12, 2825–2830.
- 1643 128. Darmon, D. (2020). transCSSR. GitHub Repos.
- 1644
